# Supplementary material for: A method for predicting hydrogen and oxygen isotope distributions across a region's river network using reach-scale environmental attributes
Source: Copernicus journal article supplement (doi:10.5194/hess-2021-424), 2021-08-23
Supplement: Supplementary file 1 [file hess-2021-424-supplement.zip]

Archive with 2 entries (2 files):
- File S1.xlsx
- Dudley et al. supplementary file 2 - Figures and Table.pdf
