# Supplementary material for: A method for predicting hydrogen and oxygen isotope distributions across a region's river network using reach-scale environmental attributes
Source: Copernicus journal article supplement (doi:10.5194/hess-2021-424), 2021-08-23
Supplement: Supplementary file 1 [file hess-2021-424-supplement.zip › Dudley et al. supplementary file 2 - Figures and Table.pdf]

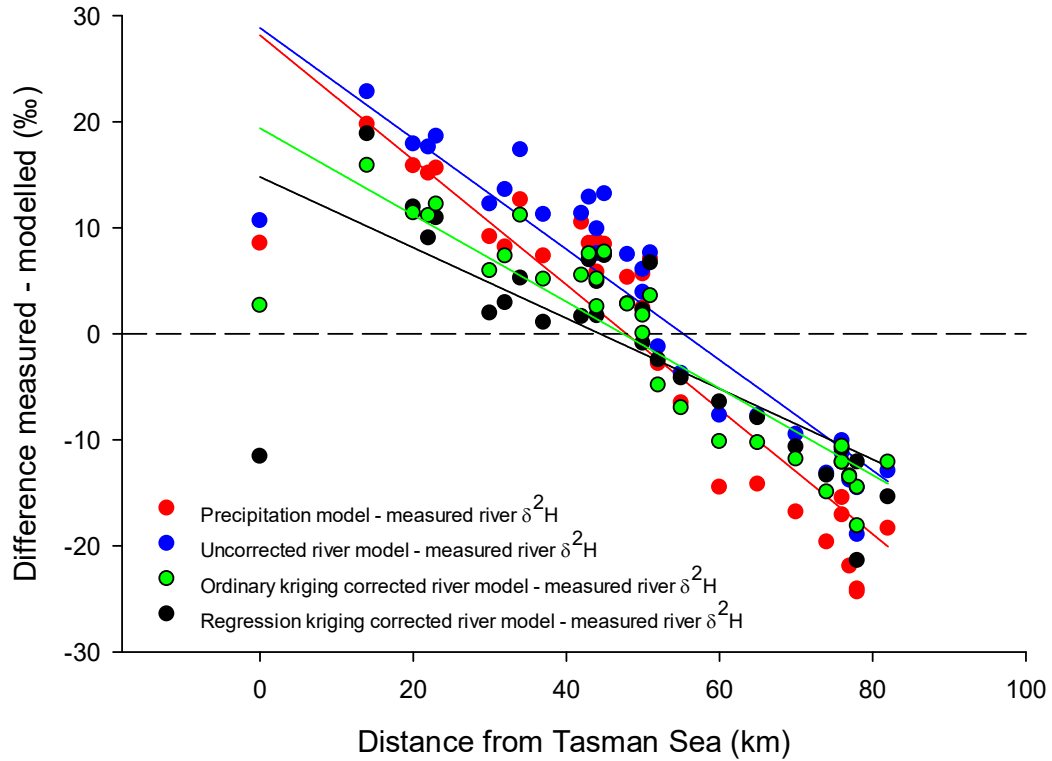

Figure S1. Comparison of measured and modelled water  $\delta^2\text{H}$  values across a west-east transect through New Zealand's Southern Alps. Measured values are river samples, taken from small rivers by Kerr et al. (2015); modelled values are those for precipitation at the nearest virtual climate station network (VCSN) point, based on the coefficients of Baisden et al. (2016), and uncorrected and residual-corrected river model values from this study. All model values show an underprediction of  $\delta^2\text{H}$  values at the western (windward) end of the transect, and an overprediction at the eastern (leeward) extent of the transect. Root Mean Square Error for the four models across this transect are 13.8‰, 12.5‰, 9.8‰ and 9.6‰ for the precipitation model, uncorrected spatiotemporal river model, ordinary-kriging corrected river model, and regression kriging corrected river model, respectively.

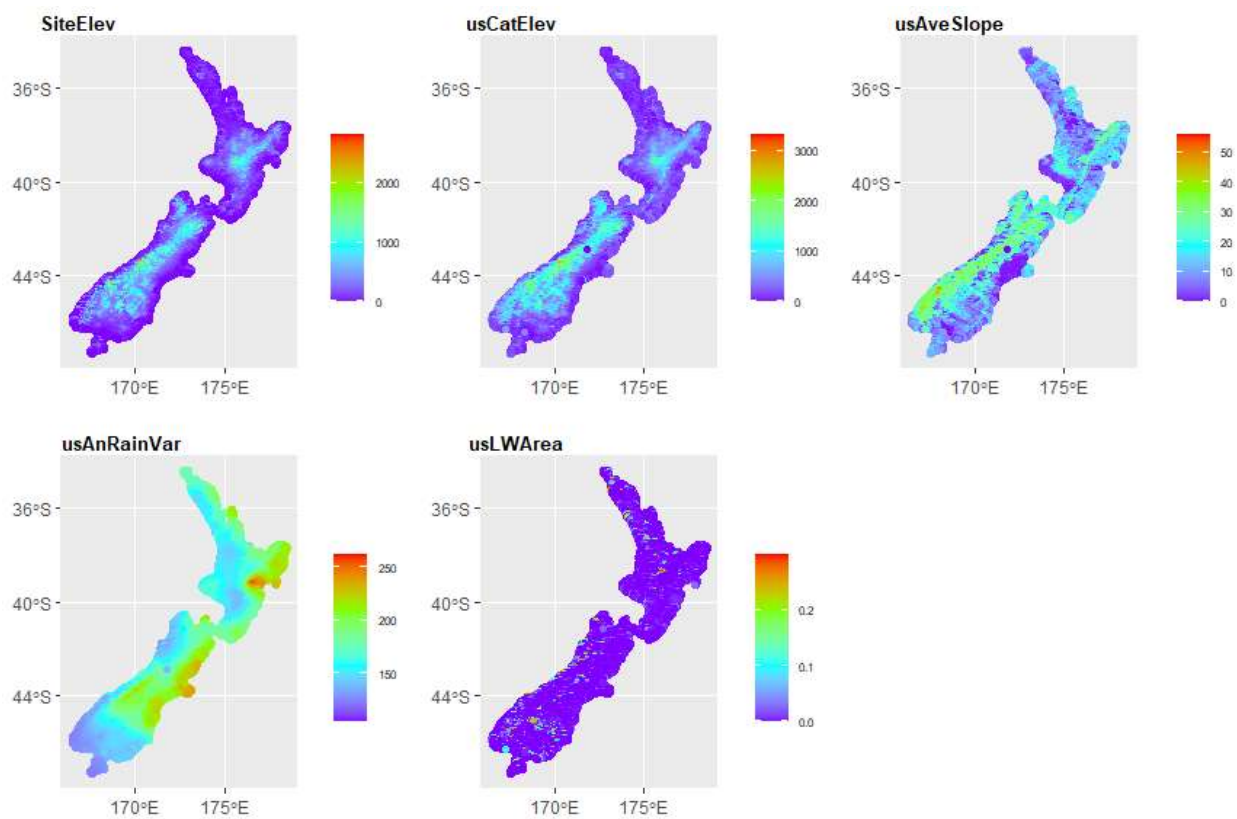

Figure S2. Spatial distribution of the five environmental variables used in regression kriging of residuals (Equation 3). Except “SiteElev”, all other factors are averaged across upstream catchments.

Table S1. Full list of catchment environmental characteristic variables

|    | Variable      | Meaning                                                                               | Source                                                                 |
|----|---------------|---------------------------------------------------------------------------------------|------------------------------------------------------------------------|
| 1  | SiteLat       | The latitude of the reach (degree)                                                    | REC (Snelder and Biggs 2002)                                           |
| 2  | SiteElev      | The elevation of the site (m)                                                         | Derived from 30m DEM (Snelder and Biggs 2002)                          |
| 3  | CatMaxElev    | Upstream maximum elevation (m)                                                        | FENZ (Leathwick et al. 2010)                                           |
| 4  | CatArea       | Upstream drainage area (km <sup>2</sup> )                                             | FENZ (Leathwick et al. 2010)                                           |
| 5  | PET           | Annual average potential evapotranspiration (mm)                                      | VCSN (Tait et al. 2006)                                                |
| 6  | AET           | Annual average actual evapotranspiration (mm)                                         | VCSN (Tait et al. 2006)                                                |
| 7  | Precip        | Annual average precipitation (mm)                                                     | VCSN (Tait et al. 2006)                                                |
| 8  | Dist2Sea      | The distance to sea (m) : from the stream to the outlet stream                        | FENZ (Leathwick et al. 2010)                                           |
| 9  | dsAveSlope    | Downstream average slope (degree)                                                     | FENZ (Leathwick et al. 2010)                                           |
| 10 | Order         | A number describing the Strahler order of a stream in the stream network (-)          | REC (Snelder and Biggs 2002)                                           |
| 11 | usAnRainVar   | Coefficient of variation of annual upstream catchment rainfall (-)                    | FENZ (Leathwick et al. 2010)                                           |
| 12 | usAveSlope    | Average upstream catchment slope (degree)                                             | FENZ (Leathwick et al. 2010)                                           |
| 13 | usAvTCold     | Average upstream temperature in cold seasons (degree)                                 | FENZ (Leathwick et al. 2010)                                           |
| 14 | usAvTWarm     | Average upstream temperature in warm seasons (degree)                                 | FENZ (Leathwick et al. 2010)                                           |
| 15 | usFlow        | Upstream annual flow (m <sup>3</sup> /s)                                              | FENZ (Leathwick et al. 2010)                                           |
| 16 | usLowFlow     | Upstream mean low flow (m <sup>3</sup> /s)                                            | FENZ (Leathwick et al. 2010)                                           |
| 17 | usSolarRadSum | Upstream solar radiation in summer (W/m <sup>2</sup> )                                | FENZ (Leathwick et al. 2010)                                           |
| 18 | usSolarRadWin | Upstream solar radiation in winter (W/m <sup>2</sup> )                                | FENZ (Leathwick et al. 2010)                                           |
| 19 | usCatElev     | Upstream catchment average elevation (m)                                              | FENZ (Leathwick et al. 2010)                                           |
| 20 | usLowGrad     | Proportion of catchment with slope >30° (steep)                                       | FENZ (Leathwick et al. 2010)                                           |
| 21 | usLWArea      | percentage of catchment in LCDB category (lakes, and inland and coastal wetlands) (%) | FENZ (Leathwick et al. 2010)                                           |
| 22 | E_P           | Ratio of evaporation over precipitation of the upstream catchment (-)                 | Calculated based on AET and precipitation from VCSN (Tait et al. 2006) |

|    | Variable    | Meaning                                                                         | Source                                                                 |
|----|-------------|---------------------------------------------------------------------------------|------------------------------------------------------------------------|
| 23 | PET_P       | Ratio of potential evaporation over precipitation of the upstream catchment (-) | Calculated based on AET and precipitation from VCSN (Tait et al. 2006) |
| 24 | DrainDsO1   | Drainage density for Strahler order 1 catchment                                 | Derived from 30m DEM (Snelder and Biggs 2002)                          |
| 25 | DrainDsO2   | Drainage density for Strahler order 2 catchment                                 | Derived from 30m DEM (Snelder and Biggs 2002)                          |
| 26 | DrainDsO3   | Drainage density for Strahler order 3 catchment                                 | Derived from 30m DEM (Snelder and Biggs 2002)                          |
| 27 | Dist2HeadO1 | Distance to Strahler order 1 headwater catchment (m)                            | Derived from 30m DEM (Snelder and Biggs 2002)                          |
| 28 | Dist2HeadO2 | Distance to Strahler order 2 headwater catchment (m)                            | Derived from 30m DEM (Snelder and Biggs 2002)                          |
| 29 | Dist2HeadO3 | Distance to Strahler order 3 headwater catchment (m)                            | Derived from 30m DEM (Snelder and Biggs 2002)                          |
| 30 | Aspect      | Average of upstream geographic aspects                                          | Derived from 30m DEM (Snelder and Biggs 2002)                          |
| 31 | Aspect_sd   | Standard deviation of upstream geographic aspects                               | Derived from 30m DEM (Snelder and Biggs 2002)                          |
