# Supplementary material for: A method for predicting hydrogen and oxygen isotope distributions across a region's river network using reach-scale environmental attributes
Source: Copernicus journal article supplement (doi:10.5194/hess-2021-424), 2021-08-23
Supplement: Supplementary file 1 [file hess-2021-424-supplement.zip › File S1.xlsx]

## Sheet: validation.dataset.dudley
Project	Site	Longitude	Latitude	Type_of_Site	O18_measured	H2_measured	d18O_uncorrected_model	d2H_uncorrected_model	d18O_ord_kriging_corrected	d2H_ord_kriging_corrected	d18O_regression_kriging_corrected	d2H_regression_kriging_corrected	nzsegment_reach code	longterm site	StreamOrder	Streamorder_group
Dudley et al. unpublished data	Waipaoa River at Kanakanaia	177.876	-38.4617	River - river, perennial flow	-6.49333	-39.3233	-6.23221	-37.2376	-6.24535	-38.1192	-6.34678	-39.6413	5122005	yes	7	Group 1
Dudley et al. unpublished data	Waihirere Stream at Domain	177.946	-38.572	River - river, perennial flow	-6.11	-35.9667	-6.03142	-34.6994	-6.01743	-36.0324	-5.77167	-35.5928	5131226	yes	2	Group 2
Dudley et al. unpublished data	Taruheru River at Tucker	177.951	-38.6002	River - river, perennial flow	-5.575	-34.425	-6.01805	-34.5686	-5.9957	-35.9951	-6.22112	-41.0102	5133578	yes	2	Group 2
Dudley et al. unpublished data	Porewa at U/S Hunterville STP Site A	175.57	-39.9454	River - river, perennial flow	-5.69625	-36.2888	-6.57784	-40.503	-6.42591	-37.4189	-5.60899	-32.24	7224518	yes	4	Group 1
Dudley et al. unpublished data	Porewa at Onepuhi Road	175.453	-40.0771	River - river, perennial flow	-6.01385	-38.6177	-6.50451	-39.4692	-6.21359	-34.742	-5.6803	-32.6151	7229125	yes	5	Group 1
Dudley et al. unpublished data	Mataura River at Parawa	168.561	-45.5594	River - river, perennial flow	-9.91769	-68.7658	-8.80926	-63.0738	-8.85055	-61.2077	-9.15209	-60.3709	15262084	yes	5	Group 1
Dudley et al. unpublished data	Waikaia River at Waipounamu Bridge Road	168.793	-45.8519	River - river, perennial flow	-9.5812	-65.5904	-8.1144	-55.6008	-8.14939	-54.5811	-8.23534	-54.0114	15283638	yes	4	Group 1
Dudley et al. unpublished data	Waimea Stream at Mandeville	168.801	-45.9872	River - river, perennial flow	-7.7264	-53.754	-7.92849	-54.4889	-7.95258	-53.445	-8.11239	-54.7657	15293327	yes	5	Group 1
Dudley et al. unpublished data	Mataura River at Gore	168.949	-46.1002	River - river, perennial flow	-9.32885	-64.3673	-8.24226	-57.6765	-8.29782	-57.0754	-8.56393	-56.8161	15299973	yes	7	Group 1
Lachniet et al. 2021	Aorere	172.629	-40.7292	River - river, perennial flow	-5.22419	-32.1322	-7.38176	-45.4165	-7.25576	-42.2027	-6.88371	-36.1072	10000868	no	5	Group 1
Lachniet et al. 2021	Pariwhakaoho	172.736	-40.7943	River - river, perennial flow	-4.7661	-30.6483	-6.85462	-44.0355	-6.74111	-40.8653	-6.26108	-35.2141	10001467	no	2	Group 2
Lachniet et al. 2021	Takaka	172.82	-40.9877	River - river, perennial flow	-6.62923	-40.4228	-7.39894	-50.1085	-7.3521	-47.3946	-7.6141	-47.4014	10005603	no	5	Group 1
Lachniet et al. 2021	Riuwaka	172.985	-41.0655	River - river, perennial flow	-6.38305	-41.6901	-6.85891	-44.9597	-6.84314	-42.2682	-6.83082	-41.8677	10007464	no	4	Group 1
Lachniet et al. 2021	Whangamoa	173.486	-41.1862	River - river, perennial flow	-5.1974	-30.5362	-6.67183	-43.268	-6.63546	-39.6382	-6.39546	-39.9939	10011387	no	3	Group 1
Lachniet et al. 2021	Dove	172.824	-41.2626	River - river, perennial flow	-5.80632	-35.8935	-6.81129	-44.0856	-6.90217	-42.0036	-6.66401	-41.7474	10014113	no	4	Group 1
Lachniet et al. 2021	Karamea	172.131	-41.2607	River - river, perennial flow	-5.68841	-34.1537	-7.38414	-47.1828	-7.32228	-43.7593	-7.24798	-39.2828	12014056	no	6	Group 1
Lachniet et al. 2021	O'Connor Creek	173.107	-41.2993	River - river, perennial flow	-5.68656	-36.0355	-6.24488	-39.3085	-6.33556	-37.143	-6.1495	-38.9641	10015500	no	4	Group 1
Lachniet et al. 2021	Pelorus	173.572	-41.2981	River - river, perennial flow	-6.43011	-39.5925	-6.98896	-45.8952	-6.96953	-42.358	-6.69643	-41.0202	11015588	no	5	Group 1
Lachniet et al. 2021	Waimea	173.129	-41.3106	River - river, perennial flow	-5.96981	-44.0021	-6.80558	-44.6789	-6.88651	-42.4413	-6.77879	-41.6057	10015141	no	6	Group 1
Lachniet et al. 2021	Little Wanganui	172.092	-41.3753	River - river, perennial flow	-5.68916	-33.4625	-6.86309	-44.1467	-6.81446	-40.3915	-6.32069	-38.3713	12018912	no	1	Group 2
Lachniet et al. 2021	Motupiko	172.833	-41.4498	River - river, perennial flow	-6.39752	-39.1524	-7.20543	-47.9754	-7.39946	-46.1756	-7.38225	-46.375	10021971	no	5	Group 1
Lachniet et al. 2021	Motueka	172.834	-41.4491	River - river, perennial flow	-7.49647	-49.8615	-7.43924	-51.484	-7.63505	-49.6879	-7.79978	-49.8816	10022098	no	5	Group 1
Lachniet et al. 2021	Wairau	173.812	-41.4753	River - river, perennial flow	-8.63596	-55.9537	-6.8109	-44.793	-6.75864	-40.8352	-6.19222	-38.4619	11023283	no	4	Group 1
Lachniet et al. 2021	Mokihinui	171.968	-41.5288	River - river, perennial flow	-5.43247	-32.2834	-7.44396	-48.3449	-7.35659	-43.6662	-6.89483	-38.0348	12025798	no	6	Group 1
Lachniet et al. 2021	Waihopai	173.732	-41.5283	River - river, perennial flow	-8.48993	-53.7881	-7.44889	-51.5601	-7.4405	-48.2524	-7.56189	-48.7841	11025548	no	6	Group 1
Lachniet et al. 2021	Granity Creek	171.855	-41.6281	River - river, perennial flow	-5.39504	-30.7458	-7.41014	-47.6253	-7.26041	-42.1132	-7.18787	-42.764	12030293	no	2	Group 2
Lachniet et al. 2021	Glen	172.651	-41.6486	River - river, perennial flow	-6.95622	-45.4082	-7.4677	-51.0676	-7.71839	-48.9211	-7.59589	-48.7604	12030933	no	4	Group 1
Lachniet et al. 2021	Awatere	174.077	-41.6581	River - river, perennial flow	-8.96529	-60.6125	-7.88974	-55.3516	-7.77481	-50.8845	-8.35232	-56.2225	11031665	no	6	Group 1
Lachniet et al. 2021	Branch	173.178	-41.6737	River - river, perennial flow	-8.98858	-59.3187	-7.97013	-56.8864	-8.22059	-55.4947	-8.43339	-54.5266	11031979	no	5	Group 1
Lachniet et al. 2021	Owen	172.451	-41.6851	River - river, perennial flow	-6.56928	-40.6353	-7.48277	-51.7074	-7.65517	-48.7538	-7.58773	-46.5644	12032521	no	5	Group 1
Lachniet et al. 2021	Blind	174.096	-41.6974	River - river, perennial flow	-6.62446	-45.3976	-6.73563	-43.3116	-6.62019	-38.9177	-6.58735	-44.5531	11033517	no	4	Group 1
Lachniet et al. 2021	Waimangaroa	171.765	-41.7108	River - river, perennial flow	-5.08267	-29.173	-7.47126	-47.7987	-7.25825	-41.5597	-6.20755	-35.3485	12034288	no	3	Group 1
Lachniet et al. 2021	Hainemot?	172.687	-41.7221	River - river, perennial flow	-7.32781	-45.7655	-7.60303	-51.5591	-7.88477	-49.4683	-7.94184	-51.1939	12034581	no	5	Group 1
Lachniet et al. 2021	Newton	172.177	-41.7761	River - river, perennial flow	-6.6013	-41.0562	-7.44223	-49.4816	-7.44892	-45.0035	-6.97402	-39.5554	12037330	no	4	Group 1
Lachniet et al. 2021	Te Horowai	172.771	-41.7748	River - river, perennial flow	-8.1335	-53.7231	-7.8591	-54.4695	-8.17934	-52.6059	-8.31108	-53.9319	12037088	no	3	Group 1
Lachniet et al. 2021	Blackwater	171.791	-41.8482	River - river, perennial flow	-5.00316	-30.7102	-7.46441	-46.5657	-7.21576	-39.9012	-6.51696	-33.0432	12042135	no	4	Group 1
Lachniet et al. 2021	Nile	171.444	-41.9003	River - river, perennial flow	-5.54509	-34.0258	-6.88446	-43.3088	-6.5253	-35.1543	-5.81075	-32.3401	12045347	no	3	Group 1
Lachniet et al. 2021	Rappahannock	172.241	-42.077	River - river, perennial flow	-7.43542	-49.7392	-7.45674	-51.6701	-7.40316	-46.7416	-6.87234	-43.075	12054647	no	5	Group 1
Lachniet et al. 2021	Punakaiki	171.334	-42.1242	River - river, perennial flow	-4.52083	-24.6618	-7.3883	-46.5854	-6.94204	-37.5908	-6.24723	-32.6877	12057705	no	4	Group 1
Lachniet et al. 2021	Station Creek	172.219	-42.1863	River - river, perennial flow	-7.84998	-49.5936	-7.64628	-53.7619	-7.52908	-48.5102	-7.4022	-47.1372	12060408	no	5	Group 1
Lachniet et al. 2021	Inangahua	171.935	-42.1886	River - river, perennial flow	-6.95147	-41.573	-7.74304	-54.8214	-7.45911	-48.0012	-7.3504	-45.9924	12060279	no	5	Group 1
Lachniet et al. 2021	Little Grey	171.721	-42.1987	River - river, perennial flow	-5.92146	-38.4574	-7.36939	-48.7317	-6.9721	-40.8654	-6.47939	-38.4964	12061216	no	5	Group 1
Lachniet et al. 2021	Blackwater	171.699	-42.2403	River - river, perennial flow	-6.26714	-39.031	-7.49006	-50.0577	-7.07012	-42.0871	-6.84471	-41.5624	12063559	no	4	Group 1
Lachniet et al. 2021	Grey	171.671	-42.2878	River - river, perennial flow	-6.68058	-43.2878	-7.68694	-53.2761	-7.24158	-45.1958	-7.11559	-44.5722	12065994	no	5	Group 1
Lachniet et al. 2021	Maruria	172.204	-42.3084	River - river, perennial flow	-8.13625	-55.3443	-7.99038	-57.9462	-7.82515	-52.5599	-7.96041	-52.7396	12066447	no	5	Group 1
Lachniet et al. 2021	Rocky Creek	172.138	-42.3306	River - river, perennial flow	-7.03987	-44.0969	-7.86529	-55.8796	-7.65501	-50.1386	-7.33861	-47.5525	12067912	no	1	Group 2
Lachniet et al. 2021	Red Jacks Creek	171.437	-42.4026	River - river, perennial flow	-5.88617	-37.2334	-7.14472	-46.5112	-6.6125	-37.9714	-6.31579	-38.3106	12071994	no	4	Group 1
Lachniet et al. 2021	Arnold	171.376	-42.4817	River - river, perennial flow	-5.64501	-32.7512	-7.43325	-49.5059	-6.89164	-41.1951	-5.84521	-36.8528	12075558	no	6	Group 1
Lachniet et al. 2021	Boyle	172.385	-42.5149	River - river, perennial flow	-8.1824	-55.9538	-8.46795	-61.382	-8.35986	-57.2291	-8.66037	-58.8844	13076785	no	5	Group 1
Lachniet et al. 2021	Hope	172.456	-42.5876	River - river, perennial flow	-8.06356	-57.3025	-8.38811	-61.1447	-8.31312	-57.5928	-8.58819	-58.4976	13080176	no	6	Group 1
Lachniet et al. 2021	Crooked	171.558	-42.6346	River - river, perennial flow	-6.37005	-38.6744	-7.77512	-53.3273	-7.34411	-46.3661	-7.11874	-44.183	12082641	no	5	Group 1
Lachniet et al. 2021	Waiau	172.801	-42.6895	River - river, perennial flow	-8.42067	-61.8953	-8.26073	-57.4505	-8.28003	-55.6286	-8.61897	-56.2594	13084605	no	7	Group 1
Lachniet et al. 2021	Arahura	171.029	-42.672	River - river, perennial flow	-6.0217	-36.0714	-7.89791	-50.8559	-7.49675	-43.7148	-7.57999	-46.2744	12084752	no	5	Group 1
Lachniet et al. 2021	Taramakau	171.51	-42.7381	River - river, perennial flow	-7.30446	-43.4896	-7.68801	-51.9229	-7.30686	-45.7838	-7.07972	-45.7373	12087472	no	2	Group 2
Lachniet et al. 2021	Pahau	172.829	-42.7974	River - river, perennial flow	-8.18206	-55.7713	-8.12732	-54.4074	-8.16419	-52.9898	-8.41907	-56.4877	13089938	no	4	Group 1
Lachniet et al. 2021	Rolleston	171.559	-42.8497	River - river, perennial flow	-6.86604	-44.1053	-8.95424	-61.4664	-8.65382	-56.5971	-8.9734	-56.5296	12092892	no	4	Group 1
Lachniet et al. 2021	Hurunui	173.097	-42.8986	River - river, perennial flow	-7.99694	-54.2292	-8.02994	-54.5923	-8.27367	-55.2391	-8.27367	-55.2391	13094859	no	7	Group 1
Lachniet et al. 2021	Peg Leg Creek	171.56	-42.895	River - river, perennial flow	-8.23868	-53.7766	-8.92103	-62.5288	-8.64943	-58.2179	-8.95656	-59.0095	12095100	no	2	Group 2
Lachniet et al. 2021	Totara	170.846	-42.8833	River - river, perennial flow	-5.76063	-31.2662	-7.43808	-47.5553	-7.15505	-42.7542	-6.74539	-40.0217	12095022	no	4	Group 1
Lachniet et al. 2021	Waikari	172.873	-42.9399	River - river, perennial flow	-7.7569	-53.9289	-7.54602	-48.2924	-7.62156	-47.5013	-7.9868	-55.8037	13096949	no	5	Group 1
Lachniet et al. 2021	Rough Creek	171.568	-42.9478	River - river, perennial flow	-8.40704	-57.2375	-8.64175	-61.7809	-8.40573	-58.1647	-8.86017	-60.5519	13097845	no	3	Group 1
Lachniet et al. 2021	Tipapa Stream	172.971	-42.9632	River - river, perennial flow	-7.03242	-47.52	-7.47487	-47.4234	-7.55492	-46.8707	-7.8416	-54.4769	13098043	no	2	Group 2
Lachniet et al. 2021	Kakapotahi	170.712	-42.9789	River - river, perennial flow	-6.03767	-35.5793	-7.99633	-52.6925	-7.76382	-49.0598	-7.81192	-47.8971	12100081	no	4	Group 1
Lachniet et al. 2021	Waitaha	170.685	-42.9808	River - river, perennial flow	-7.41366	-47.4917	-7.964	-53.4774	-7.73438	-49.822	-8.17759	-51.2808	12100095	no	5	Group 1
Lachniet et al. 2021	Weka	172.752	-43.0664	River - river, perennial flow	-7.76882	-57.6742	-7.55403	-48.0503	-7.67691	-47.6833	-7.92286	-54.3253	13103038	no	4	Group 1
Lachniet et al. 2021	Whanganui	170.625	-43.1552	River - river, perennial flow	-7.92119	-54.0878	-8.821	-60.191	-8.67823	-58.9012	-9.51551	-60.612	12109146	no	5	Group 1
Lachniet et al. 2021	Kowai	172.747	-43.1911	River - river, perennial flow	-7.09445	-49.5075	-7.24459	-45.2352	-7.42413	-45.6538	-7.79609	-54.6395	13109958	no	5	Group 1
Lachniet et al. 2021	Porter	171.726	-43.2451	River - river, perennial flow	-10.4606	-75.1158	-9.13627	-63.831	-9.15441	-64.6245	-9.65202	-66.2545	13112665	no	5	Group 1
Lachniet et al. 2021	Ashley	172.688	-43.2779	River - river, perennial flow	-8.66574	-64.3431	-8.25026	-55.8526	-8.46689	-56.7885	-8.82853	-61.2844	13113942	no	7	Group 1
Lachniet et al. 2021	Ashley (replicate)	172.689	-43.2787	River - river, perennial flow	-8.74445	-63.3789	-8.25026	-55.8526	-8.46689	-56.7885	-8.82853	-61.2844	13113942	no	7	Group 1
Lachniet et al. 2021	Waitangi Taona	170.307	-43.2826	River - river, perennial flow	-6.54883	-44.7108	-8.20428	-55.0721	-8.10228	-54.4382	-8.06562	-50.1237	12115185	no	4	Group 1
Lachniet et al. 2021	Whateroa	170.402	-43.2854	River - river, perennial flow	-8.8612	-56.171	-8.66072	-59.3557	-8.57099	-59.1834	-9.36937	-60.2277	12115419	no	6	Group 1
Lachniet et al. 2021	Kowai	171.866	-43.3317	River - river, perennial flow	-9.33435	-66.5384	-8.44366	-56.1811	-8.5589	-58.2041	-8.41001	-57.2402	13116719	no	1	Group 2
Lachniet et al. 2021	Waimakiriri	172.649	-43.414	River - river, perennial flow	-8.66214	-59.999	-7.85233	-52.9004	-8.11573	-54.6502	-8.54479	-56.5954	13119371	no	7	Group 1
Lachniet et al. 2021	Waiho	170.178	-43.3901	River - river, perennial flow	-9.11103	-60.7088	-9.13845	-64.6049	-9.05296	-64.587	-10.2055	-66.3421	12120325	no	5	Group 1
Lachniet et al. 2021	Omoeroa	170.096	-43.4051	River - river, perennial flow	-6.54836	-43.3937	-8.6164	-60.193	-8.52431	-60.0479	-8.27297	-53.0415	12121758	no	3	Group 1
Lachniet et al. 2021	Selwyn	171.926	-43.4813	River - river, perennial flow	-8.37273	-60.157	-8.35568	-54.8953	-8.56521	-58.9528	-8.70854	-58.6405	13124144	yes	5	Group 1
Lachniet et al. 2021	Horoata/Hororata	171.803	-43.517	River - river, perennial flow	-7.82756	-55.0574	-8.24499	-53.3465	-8.47274	-58.1837	-8.79517	-59.6221	13125600	no	4	Group 1
Lachniet et al. 2021	Rakaia	171.658	-43.519	River - river, perennial flow	-8.39043	-61.923	-8.34994	-53.8535	-8.58411	-59.018	-9.15438	-63.1386	13125314	no	1	Group 2
Lachniet et al. 2021	Cook/Wehaka	169.966	-43.499	River - river, perennial flow	-8.56069	-54.9358	-8.89949	-63.1473	-8.80248	-63.0401	-9.42937	-61.5837	12126601	no	5	Group 1
Lachniet et al. 2021	Fox	170.044	-43.498	River - river, perennial flow	-9.67733	-61.9332	-9.39102	-68.5015	-9.30875	-68.8229	-11.0343	-74.8321	12126243	no	4	Group 1
Lachniet et al. 2021	Ashburton	171.532	-43.6058	River - river, perennial flow	-10.3746	-75.524	-8.29888	-53.525	-8.61803	-60.275	-9.30903	-65.6711	13130188	no	1	Group 2
Lachniet et al. 2021	Jacobs	169.68	-43.5727	River - river, perennial flow	-6.89073	-51.1139	-8.04612	-55.5628	-7.90853	-54.0399	-7.76322	-48.7164	12130921	no	4	Group 1
Lachniet et al. 2021	Small stream at Tasman Glacier parking lot	170.163	-43.6982	River - river, perennial flow	-9.20544	-66.7827	-9.04798	-64.5299	-9.10442	-67.9158	-10.1435	-73.7979	13137463	no	3	Group 1
Lachniet et al. 2021	Tasman	170.171	-43.7064	River - river, perennial flow	-9.55983	-71.8747	-9.37956	-68.2158	-9.44762	-71.7801	-10.9751	-79.9736	13137949	no	5	Group 1
Lachniet et al. 2021	Paringa	169.49	-43.7109	River - river, perennial flow	-7.28102	-47.4358	-8.29127	-57.2184	-8.13872	-55.2074	-7.99113	-51.0149	12139745	no	5	Group 1
Lachniet et al. 2021	Hooker	170.128	-43.7406	River - river, perennial flow	-9.45229	-67.3415	-9.24654	-68.2559	-9.33535	-72.1236	-10.7177	-78.4797	13141091	no	5	Group 1
Lachniet et al. 2021	Whakapohai	169.245	-43.7295	River - river, perennial flow	-5.07549	-29.0079	-7.63476	-52.0092	-7.47555	-48.4564	-6.40466	-39.0341	12141104	no	4	Group 1
Lachniet et al. 2021	The Windbag	169.373	-43.7652	River - river, perennial flow	-5.63474	-42.3878	-7.95041	-52.6372	-7.78974	-50.0428	-6.84793	-41.4531	12143376	no	3	Group 1
Lachniet et al. 2021	Boulder Creek	169.329	-43.7645	River - river, perennial flow	-6.02456	-36.9009	-7.74364	-51.5706	-7.58252	-48.6772	-6.56406	-38.1036	12142834	no	1	Group 2
Lachniet et al. 2021	Hinds	171.43	-43.8092	River - river, perennial flow	-8.59347	-66.8049	-8.05163	-51.3312	-8.5847	-61.1363	-9.14837	-62.4398	13143208	no	5	Group 1
Lachniet et al. 2021	Waita	169.122	-43.7902	River - river, perennial flow	-5.33693	-33.5536	-7.50399	-50.2969	-7.3425	-46.293	-5.16305	-33.0662	12145312	no	5	Group 1
Lachniet et al. 2021	MacPhearson's Creek	169.315	-43.9556	River - river, perennial flow	-7.28619	-44.166	-7.8837	-56.5589	-7.71965	-54.3722	-7.66657	-50.4515	12153504	no	3	Group 1
Lachniet et al. 2021	Fork Stream	170.412	-44.0007	River - river, perennial flow	-11.3708	-81.1318	-9.15599	-65.0814	-9.65107	-73.4874	-10.7768	-78.593	13154190	no	4	Group 1
Lachniet et al. 2021	Roaring Swine Creek	169.215	-43.9711	River - river, perennial flow	-6.95922	-44.8362	-7.97743	-55.322	-7.8138	-52.5146	-6.98447	-42.8346	12154538	no	3	Group 1
Lachniet et al. 2021	No name	171.278	-44.0155	River - river, perennial flow	-8.0684	-58.4009	-7.88316	-49.8474	-8.72158	-61.7888	-9.00464	-61.8098	13154549	no	4	Group 1
Lachniet et al. 2021	Haast	169.383	-44.0127	River - river, perennial flow	-7.96182	-50.9076	-8.1216	-57.1465	-7.97372	-55.7746	-8.44736	-56.2281	12156212	no	5	Group 1
Lachniet et al. 2021	Orari	171.27	-44.0442	River - river, perennial flow	-10.0273	-75.8089	-8.23991	-53.8413	-9.11883	-66.0501	-9.53848	-62.9857	13153240	no	6	Group 1
Lachniet et al. 2021	Boundary Stream	170.134	-44.0534	River - river, perennial flow	-11.0436	-80.834	-9.47586	-68.1912	-9.76593	-74.4239	-10.9126	-78.8208	13157398	no	3	Group 1
Lachniet et al. 2021	Opihi	170.834	-44.0965	River - river, perennial flow	-8.769	-64.7162	-8.46337	-55.5664	-9.42248	-67.3089	-9.63451	-65.8033	13159006	no	5	Group 1
Lachniet et al. 2021	Arawhata	168.726	-44.0455	River - river, perennial flow	-7.59607	-46.0425	-8.12421	-58.3223	-7.99041	-53.4815	-7.73508	-49.6866	12159388	no	6	Group 1
Lachniet et al. 2021	Jackson	168.702	-44.058	River - river, perennial flow	-5.63281	-33.6075	-7.46208	-50.8453	-7.33159	-45.9932	-6.04178	-35.9058	12160174	no	2	Group 2
Lachniet et al. 2021	Temuka	171.209	-44.1169	River - river, perennial flow	-8.1389	-58.9738	-7.97423	-50.787	-8.93847	-63.3021	-9.01511	-60.7514	13159794	no	4	Group 1
Lachniet et al. 2021	Stony Creek	171.047	-44.125	River - river, perennial flow	-7.81872	-58.5974	-8.02658	-50.9541	-9.07812	-63.408	-9.15907	-62.9038	13160426	no	3	Group 1
Lachniet et al. 2021	Sawdon Stream	170.547	-44.0882	River - river, perennial flow	-10.1022	-76.8156	-9.05451	-60.9884	-9.74308	-71.0162	-10.1657	-69.4688	13158901	no	3	Group 1
Lachniet et al. 2021	Cross Creek	169.359	-44.1001	River - river, perennial flow	-8.019	-47.3403	-8.35241	-61.4093	-8.22001	-60.2047	-8.51377	-63.699	12161362	no	2	Group 2
Lachniet et al. 2021	Waterfall/small stream, no name	169.346	-44.1131	River - river, perennial flow	-7.54528	-49.6451	-8.2892	-60.7761	-8.15842	-59.5031	-8.33952	-61.1805	14161991	no	1	Group 2
Lachniet et al. 2021	Cannan's Creek	169.342	-44.1185	River - river, perennial flow	-8.08659	-49.1597	-8.20069	-59.5918	-8.07073	-58.3424	-8.45914	-60.5094	14162468	no	1	Group 2
Lachniet et al. 2021	Cascade	168.532	-44.1033	River - river, perennial flow	-6.81998	-39.5551	-8.01165	-57.0132	-7.89239	-51.9028	-7.46987	-46.5189	12162742	no	4	Group 1
Lachniet et al. 2021	Cameron Creek	169.3	-44.1569	River - river, perennial flow	-8.56837	-64.3416	-8.48794	-63.4911	-8.36274	-62.036	-9.47759	-69.2966	14164618	no	4	Group 1
Lachniet et al. 2021	Makarora	169.292	-44.158	River - river, perennial flow	-9.71051	-66.4338	-8.44884	-62.6668	-8.32379	-61.1621	-9.16747	-66.4152	14164617	no	5	Group 1
Lachniet et al. 2021	No name	169.828	-44.2551	River - river, perennial flow	-10.9245	-78.4488	-9.43519	-68.2789	-9.59008	-72.7187	-9.75012	-72.5443	13169778	no	3	Group 1
Lachniet et al. 2021	Twizel	170.111	-44.2555	River - river, perennial flow	-11.5942	-77.3763	-8.79718	-59.9992	-9.20872	-67.3447	-9.81779	-70.9003	13169345	no	5	Group 1
Lachniet et al. 2021	Boundary Creek	169.169	-44.3528	River - river, perennial flow	-10.416	-73.7011	-9.07809	-67.3675	-9.00945	-65.7893	-10.1855	-73.7343	14176616	no	4	Group 1
Lachniet et al. 2021	Ahuriri	169.988	-44.4705	River - river, perennial flow	-10.8341	-76.4712	-9.23154	-64.8179	-9.5577	-71.0524	-10.3723	-74.8258	13182848	no	5	Group 1
Lachniet et al. 2021	Otaio	171.179	-44.5464	River - river, perennial flow	-7.78147	-51.4342	-7.70481	-49.1615	-8.51638	-61.3517	-8.96218	-63.954	13185975	no	4	Group 1
Lachniet et al. 2021	Craigburn	169.245	-44.5413	River - river, perennial flow	-11.4856	-77.498	-9.03439	-62.8787	-9.03608	-62.5588	-9.20512	-62.9867	14188651	no	4	Group 1
Lachniet et al. 2021	Motukituki	168.896	-44.5449	River - river, perennial flow	-8.88146	-61.0803	-8.97533	-68.4138	-8.98643	-66.0092	-9.68889	-69.4559	14189538	no	5	Group 1
Lachniet et al. 2021	Otematata	170.203	-44.6052	River - river, perennial flow	-11.2309	-83.5416	-8.90792	-62.0532	-9.47111	-70.2209	-10.5641	-73.4593	13190895	no	6	Group 1
Lachniet et al. 2021	Awahokomo	170.399	-44.6818	River - river, perennial flow	-10.7586	-76.8613	-8.84202	-61.2942	-9.61863	-70.7104	-10.0847	-70.9533	13195345	no	3	Group 1
Lachniet et al. 2021	No name	168.97	-44.6437	River - river, perennial flow	-9.66876	-69.5133	-9.04044	-63.7289	-9.08707	-62.0402	-9.26264	-64.2448	14195739	no	1	Group 2
Lachniet et al. 2021	Motatupo	168.954	-44.6546	River - river, perennial flow	-11.6473	-80.1585	-9.36966	-69.0562	-9.41873	-67.2514	-10.2622	-71.6443	14196106	no	5	Group 1
Lachniet et al. 2021	Glendhu Stream	169.003	-44.6696	River - river, perennial flow	-10.8209	-77.5091	-9.38649	-67.4454	-9.43414	-66.0811	-9.84727	-68.3078	14197026	no	4	Group 1
Lachniet et al. 2021	Cardrona	169.177	-44.6993	River - river, perennial flow	-11.3806	-82.3926	-9.18898	-64.2934	-9.23557	-63.9979	-10.0577	-68.5149	14198538	no	5	Group 1
Lachniet et al. 2021	Cleddau	167.929	-44.6775	River - river, perennial flow	-5.77241	-34.5083	-8.32713	-62.2786	-8.30996	-58.147	-7.98452	-49.39	15200625	no	5	Group 1
Lachniet et al. 2021	Tutok	167.963	-44.6778	River - river, perennial flow	-6.25947	-42.4634	-8.40353	-62.1853	-8.39577	-58.0742	-8.27449	-50.4228	15200508	no	4	Group 1
Lachniet et al. 2021	Luggate Creek	169.269	-44.7485	River - river, perennial flow	-12.778	-88.0481	-9.36447	-66.2255	-9.42744	-66.7235	-11.0622	-76.7618	14201610	no	5	Group 1
Lachniet et al. 2021	Waiho	171.096	-44.7958	River - river, perennial flow	-8.73557	-63.5152	-7.88856	-51.102	-8.48548	-61.5633	-9.04114	-64.1512	13202176	no	5	Group 1
Lachniet et al. 2021	No name	167.973	-44.7613	River - river, perennial flow	-5.09401	-28.0367	-8.65696	-66.8727	-8.6664	-62.8922	-7.93573	-52.2476	15206507	no	1	Group 2
Lachniet et al. 2021	Maerewhenua	170.688	-44.8569	River - river, perennial flow	-9.25604	-65.8741	-8.52321	-58.3552	-9.2095	-68.1086	-9.59236	-69.0264	13207053	no	5	Group 1
Lachniet et al. 2021	Hollyford	168.103	-44.8083	River - river, perennial flow	-7.50064	-51.4574	-8.54278	-66.2238	-8.59859	-62.4544	-8.65216	-57.8373	15209326	no	4	Group 1
Lachniet et al. 2021	Lindis	169.354	-44.8808	River - river, perennial flow	-11.1656	-81.065	-8.96872	-61.7595	-9.09377	-63.0605	-9.98134	-68.1516	14211471	no	6	Group 1
Lachniet et al. 2021	Sonora Creek	169.286	-45.0958	River - river, perennial flow	-11.4542	-85.4307	-8.89243	-62.0438	-9.0539	-63.1894	-9.88397	-66.0051	14226093	no	3	Group 1
Lachniet et al. 2021	No name	168.011	-45.0511	River - river, perennial flow	-9.14183	-61.4452	-8.86799	-68.3505	-8.91136	-64.7336	-9.62038	-66.7468	15226790	no	4	Group 1
Lachniet et al. 2021	Swinburn	170.308	-45.1422	River - river, perennial flow	-10.3059	-73.9234	-8.67672	-59.7088	-9.0426	-66.266	-9.56257	-68.8352	14227488	no	4	Group 1
Lachniet et al. 2021	Kakanui	170.841	-45.1637	River - river, perennial flow	-8.7501	-61.2619	-8.28959	-55.4082	-8.59507	-62.6334	-9.17717	-65.5646	14228439	no	6	Group 1
Lachniet et al. 2021	Kyburn	170.262	-45.1491	River - river, perennial flow	-10.1676	-74.6021	-8.39672	-56.6104	-8.75294	-62.9719	-9.3633	-68.0058	14228301	no	3	Group 1
Lachniet et al. 2021	Eglington	167.967	-45.1008	River - river, perennial flow	-8.01922	-55.7782	-8.53405	-63.1032	-8.55905	-59.4365	-8.72079	-59.5482	15230210	no	3	Group 1
Lachniet et al. 2021	Pig Root Creek	170.425	-45.1964	River - river, perennial flow	-9.59087	-72.7621	-8.71528	-60.5591	-9.06131	-67.1145	-9.35986	-67.6079	14231306	no	4	Group 1
Lachniet et al. 2021	Taieri	170.248	-45.2007	River - river, perennial flow	-9.17717	-67.3851	-8.49675	-58.1869	-8.83277	-64.2343	-9.1793	-65.5232	14231935	no	6	Group 1
Lachniet et al. 2021	Huntley Creek	170.459	-45.2462	River - river, perennial flow	-9.20714	-66.1534	-8.44561	-58.1372	-8.76544	-64.4316	-9.02292	-65.3063	14233393	no	2	Group 2
Lachniet et al. 2021	Waianakarua	170.797	-45.257	River - river, perennial flow	-8.50053	-57.498	-8.32639	-55.9337	-8.56329	-62.3348	-8.89704	-62.7247	14235133	no	4	Group 1
Lachniet et al. 2021	Fraser	169.323	-45.2223	River - river, perennial flow	-11.2482	-78.462	-8.89224	-62.6669	-9.0626	-64.1567	-10.1558	-68.781	14234862	no	5	Group 1
Lachniet et al. 2021	No name	167.875	-45.1868	River - river, perennial flow	-7.80657	-52.584	-8.38721	-59.0788	-8.37421	-55.2654	-8.37925	-55.6449	15235756	no	5	Group 1
Lachniet et al. 2021	Manuherikia	169.399	-45.254	River - river, perennial flow	-10.6231	-81.8424	-8.46254	-57.0657	-8.64152	-58.9256	-9.65157	-65.1063	14237056	no	7	Group 1
Lachniet et al. 2021	Happy Valley Creek	170.555	-45.3111	River - river, perennial flow	-7.99368	-61.196	-8.20267	-54.7637	-8.47799	-60.7303	-8.66698	-62.9864	14239210	no	1	Group 2
Lachniet et al. 2021	Rea	167.169	-45.2498	River - river, perennial flow	-6.70447	-39.3107	-8.22299	-61.1186	-8.06997	-56.5646	-7.37603	-46.0096	15243382	no	5	Group 1
Lachniet et al. 2021	Heeney Creek	170.212	-45.3822	River - river, perennial flow	-9.40926	-66.7534	-8.54864	-59.5034	-8.84474	-64.4789	-9.66347	-68.6727	14245075	no	3	Group 1
Lachniet et al. 2021	McCormick's Creek	170.635	-45.3929	River - river, perennial flow	-8.10162	-57.4294	-8.19887	-54.6439	-8.41581	-60.0593	-8.83274	-63.0621	14245252	no	3	Group 1
Lachniet et al. 2021	Shag	170.644	-45.4059	River - river, perennial flow	-8.58897	-60.598	-8.26718	-55.4359	-8.47612	-60.7527	-8.99751	-64.1313	14245642	no	5	Group 1
Lachniet et al. 2021	Gorge Creek	169.277	-45.3756	River - river, perennial flow	-10.8529	-76.7637	-9.13072	-65.3394	-9.29547	-66.5821	-10.0319	-67.4763	14246591	no	4	Group 1
Lachniet et al. 2021	Ewe Burn	167.774	-45.3423	River - river, perennial flow	-7.69791	-54.3669	-8.48011	-58.8263	-8.40114	-54.7225	-6.689	-46.125	15247728	no	3	Group 1
Lachniet et al. 2021	Shag	170.773	-45.4732	River - river, perennial flow	-8.38239	-59.5481	-8.11942	-53.711	-8.25284	-58.4367	-8.70256	-61.6644	14251023	no	5	Group 1
Lachniet et al. 2021	Upukerora	167.74	-45.4103	River - river, perennial flow	-8.67796	-60.2447	-8.60139	-61.5883	-8.49891	-57.3739	-8.84378	-59.1257	15253416	no	4	Group 1
Lachniet et al. 2021	Teviot	169.321	-45.5378	River - river, perennial flow	-9.59579	-73.7687	-8.65001	-59.9576	-8.82338	-61.3408	-9.1001	-62.1708	14258734	no	5	Group 1
Lachniet et al. 2021	Troup stream, near Hostel	167.153	-45.4632	River - river, perennial flow	-6.83799	-42.0035	-8.4597	-61.7474	-8.28625	-56.824	-7.28835	-44.9334	15259818	no	2	Group 2
Lachniet et al. 2021	Troup Stream near Huntleigh Falls	167.141	-45.4713	River - river, perennial flow	-6.03636	-44.4862	-8.46449	-61.8549	-8.29085	-56.9276	-7.24711	-44.5328	15259968	no	2	Group 2
Lachniet et al. 2021	No name, small stream on Wilmont Road #1	167.178	-45.4843	River - river, perennial flow	-7.19813	-45.356	-8.49838	-62.6505	-8.3227	-57.701	-8.17993	-51.1881	15260970	no	3	Group 1
Lachniet et al. 2021	Sutton Stream	170.095	-45.5972	River - river, perennial flow	-8.50979	-62.0063	-8.38443	-58.5046	-9.16359	-64.6028	-9.16359	-64.6028	14261484	no	5	Group 1
Lachniet et al. 2021	Whitestone	167.755	-45.526	River - river, perennial flow	-8.08657	-57.0527	-8.59588	-60.9324	-8.46069	-56.5969	-8.85492	-59.4695	15262148	no	5	Group 1
Lachniet et al. 2021	Princhester Creek	167.934	-45.5455	River - river, perennial flow	-8.1079	-53.0688	-8.78644	-62.5919	-8.6877	-58.654	-8.89587	-58.0052	15262550	no	4	Group 1
Lachniet et al. 2021	Mararoa	167.887	-45.5423	River - river, perennial flow	-8.64487	-60.958	-8.47627	-59.2609	-8.36544	-55.2064	-8.87527	-60.7369	15263153	no	1	Group 2
Lachniet et al. 2021	No name, small stream on Wilmont Pass Rd. #2	167.248	-45.5221	River - river, perennial flow	-7.225	-45.947	-8.47952	-63.7884	-8.29781	-58.7999	-8.00116	-51.8054	15263772	no	3	Group 1
Lachniet et al. 2021	Hamilton Creek	168.068	-45.5668	River - river, perennial flow	-8.21943	-52.1977	-8.65175	-61.2	-8.57586	-57.6089	-8.8866	-58.5238	15264451	no	4	Group 1
Lachniet et al. 2021	No name (aka the bus wash), small stream on Wilmont Pass Rd. #3	167.229	-45.5363	River - river, perennial flow	-6.95896	-43.7783	-8.62672	-64.6856	-8.44381	-59.6675	-8.15566	-52.8594	15265040	no	4	Group 1
Lachniet et al. 2021	Deep Stream	170.052	-45.6955	River - river, perennial flow	-8.33109	-59.4077	-8.20759	-56.9024	-8.45925	-60.2314	-8.5746	-60.3981	14269191	no	4	Group 1
Lachniet et al. 2021	Whare Creek	167.688	-45.6405	River - river, perennial flow	-8.76101	-59.3754	-9.15105	-65.8863	-8.97632	-61.2615	-9.34876	-59.8892	15271310	no	4	Group 1
Lachniet et al. 2021	Oteri	168.429	-45.7166	River - river, perennial flow	-8.88336	-64.3821	-8.56515	-61.0067	-8.52862	-58.5776	-9.05942	-60.1492	15274581	no	7	Group 1
Lachniet et al. 2021	No name	168.191	-45.7227	River - river, perennial flow	-7.61793	-52.6956	-8.3895	-58.826	-8.29697	-55.5636	-8.48948	-56.5972	15276063	no	5	Group 1
Lachniet et al. 2021	Lee Stream	170.128	-45.8006	River - river, perennial flow	-7.99595	-59.7158	-8.16751	-56.6028	-8.37078	-59.6263	-8.45678	-59.4616	14277033	no	5	Group 1
Lachniet et al. 2021	No name	169.529	-45.8185	River - river, perennial flow	-7.91539	-56.7598	-8.1014	-54.6249	-8.29285	-56.4019	-7.72587	-49.0795	14279701	no	2	Group 2
Lachniet et al. 2021	Silver Stream	170.386	-45.8543	River - river, perennial flow	-7.57894	-51.7161	-7.88865	-52.1761	-8.01413	-55.0216	-7.85637	-54.3894	14280656	no	2	Group 2
Lachniet et al. 2021	Borland Burn	167.586	-45.7703	River - river, perennial flow	-7.85499	-52.6464	-8.88554	-66.8454	-8.67339	-61.9032	-8.87751	-59.5137	15281207	no	5	Group 1
Lachniet et al. 2021	Waitahuna	169.757	-45.9832	River - river, perennial flow	-8.76628	-66.9373	-8.11214	-55.4838	-8.30441	-57.4209	-8.13888	-54.3889	14291021	no	5	Group 1
Lachniet et al. 2021	Waimea	168.801	-45.9873	River - river, perennial flow	-6.70518	-49.4542	-7.92849	-54.4889	-7.95258	-53.445	-8.11239	-54.7657	15293327	no	5	Group 1
Lachniet et al. 2021	Otamita	168.825	-45.9982	River - river, perennial flow	-6.52163	-46.5204	-8.06816	-56.3499	-8.09683	-55.3767	-8.11182	-54.2738	15293926	no	5	Group 1
Lachniet et al. 2021	Tokimairiro	169.852	-46.0819	River - river, perennial flow	-8.01782	-57.1963	-8.05229	-54.8369	-8.23102	-56.6509	-7.88698	-51.867	14297472	no	5	Group 1
Lachniet et al. 2021	Toko	169.934	-46.1329	River - river, perennial flow	-8.07306	-56.3223	-7.93941	-53.6053	-8.09993	-55.3479	-7.69204	-50.1787	14300273	no	5	Group 1
Lachniet et al. 2021	Waipihi	169.169	-46.1178	River - river, perennial flow	-6.08264	-42.9483	-8.17758	-56.9059	-8.28304	-57.0881	-8.00664	-54.4962	14300751	no	5	Group 1
Lachniet et al. 2021	Paiwate	169.567	-46.2225	River - river, perennial flow	-6.99566	-47.2825	-8.02896	-55.4107	-8.18611	-56.422	-7.80643	-52.6277	14306543	no	5	Group 1
Lachniet et al. 2021	No name	169.736	-46.2779	River - river, perennial flow	-6.10468	-42.0139	-7.91451	-54.2412	-8.07	-55.3732	-7.49875	-50.2595	14309348	no	4	Group 1
Lachniet et al. 2021	Puerua	169.723	-46.3085	River - river, perennial flow	-7.27301	-49.9257	-8.00319	-55.3558	-8.14295	-56.3878	-7.57963	-49.7698	14310884	no	4	Group 1
Lachniet et al. 2021	Stream at Gemstone Beach	167.729	-46.2749	River - river, perennial flow	-6.7936	-49.2954	-8.11164	-58.606	-7.88049	-53.618	-8.01931	-54.4607	15312376	no	3	Group 1
Lachniet et al. 2021	No name	167.756	-46.3183	River - river, perennial flow	-6.33595	-40.6083	-7.99692	-57.528	-7.77626	-52.6137	-7.11312	-48.9405	15313875	no	2	Group 2
Lachniet et al. 2021	Owaka	169.678	-46.4442	River - river, perennial flow	-6.19691	-40.7708	-8.06088	-56.1015	-8.13861	-56.7124	-7.63914	-50.9365	14315991	no	4	Group 1
Lachniet et al. 2021	Catlins	169.565	-46.4747	River - river, perennial flow	-6.19247	-39.7947	-8.06279	-56.2662	-8.12708	-56.6317	-7.72957	-51.0915	14316858	no	4	Group 1
Lachniet et al. 2021	MacLennans	169.468	-46.5131	River - river, perennial flow	-7.00158	-49.1791	-7.84811	-54.353	-7.89831	-54.492	-7.54869	-50.4311	14317911	no	3	Group 1
Lachniet et al. 2021	Purakaunui	169.592	-46.5257	River - river, perennial flow	-6.78615	-47.1637	-7.79661	-53.8847	-7.84149	-54.1749	-7.28688	-48.4146	14318126	no	2	Group 2
Lachniet et al. 2021	Tahakopa	169.443	-46.5301	River - river, perennial flow	-4.40304	-28.9862	-7.77079	-53.6302	-7.81445	-53.6855	-7.07118	-46.7048	14318352	no	2	Group 2
Lachniet et al. 2021	Mclean Falls	169.346	-46.5731	River - river, perennial flow	-6.53706	-46.8739	-7.88789	-54.8651	-7.91572	-54.6503	-7.36046	-48.7345	14319445	no	3	Group 1
Lachniet et al. 2021	Waikawa	169.146	-46.5735	River - river, perennial flow	-5.86369	-39.1534	-7.96887	-55.8045	-7.99054	-55.1375	-7.59175	-51.3232	15319599	no	5	Group 1
Lachniet et al. 2021	Tokanui	168.925	-46.5697	River - river, perennial flow	-6.61135	-47.7841	-7.89413	-55.4221	-7.90536	-54.1783	-7.69703	-53.3767	15319683	no	2	Group 2
Lachniet et al. 2021	Ocean Beach, Stewart Island	168.177	-46.9736	River - river, perennial flow	-4.92948	-31.7526	-7.67053	-57.5851	-7.54209	-54.1863	-6.95282	-49.3685	15001660	no	1	Group 2
Kerr et al. 2015	Kumara Stream	171.123	-42.5745	River - river, perennial flow	-5.5	-33	-6.88947	-43.6789	-6.41808	-35.676	-3.32762	-21.444	12079805	no	2	Group 2
Kerr et al. 2015	Stoney Creek	171.227	-42.6948	River - river, perennial flow	-4.1	-23	-7.20583	-45.8254	-6.77762	-38.8838	-6.66516	-41.8582	12085409	no	1	Group 2
Kerr et al. 2015	Culvert 51	171.273	-42.7332	River - river, perennial flow	-5.2	-29	-7.45856	-46.9021	-7.05227	-40.4003	-6.65897	-40.9592	12087326	no	1	Group 2
Kerr et al. 2015	Harley Creek	171.454	-42.7386	River - river, perennial flow	-6.5	-38	-7.89628	-51.6085	-7.50373	-45.3506	-6.88932	-40.9353	12087437	no	2	Group 2
Kerr et al. 2015	Mac’s Creek	171.43	-42.74	River - river, perennial flow	-6.5	-38	-7.63818	-50.2459	-7.24267	-43.9639	-6.56506	-39.9563	12087501	no	1	Group 2
Kerr et al. 2015	Humphrey’s Creek	171.512	-42.7458	River - river, perennial flow	-7.2	-43	-8.05601	-54.2504	-7.67694	-48.1489	-7.18095	-44.0947	12087755	no	2	Group 2
Kerr et al. 2015	Blue Point Culvert	171.48	-42.7455	River - river, perennial flow	-6.1	-35	-7.96679	-52.3642	-7.58088	-46.193	-6.8178	-40.2612	12087738	no	1	Group 2
Kerr et al. 2015	Graham’s Creek	171.299	-42.7408	River - river, perennial flow	-5.7	-33	-7.80779	-50.6223	-7.40135	-44.1514	-7.13543	-42.0423	12087334	no	2	Group 2
Kerr et al. 2015	Fitzgerald’s Creek	171.31	-42.7502	River - river, perennial flow	-5.8	-33	-7.94998	-51.6256	-7.54768	-45.2331	-7.35473	-43.9489	12087703	no	1	Group 2
Kerr et al. 2015	Nellie’s Creek	171.574	-42.762	River - river, perennial flow	-7.3	-44	-8.48929	-55.3501	-8.13482	-49.5253	-7.77559	-45.6292	12088547	no	1	Group 2
Kerr et al. 2015	Culvert 56	171.61	-42.7826	River - river, perennial flow	-6.6	-41	-8.33391	-54.2003	-8.00488	-48.7054	-7.91726	-48.3749	12089633	no	1	Group 2
Kerr et al. 2015	Side stream of Kelly's	171.57	-42.803	River - river, perennial flow	-7.2	-44	-8.59528	-56.8776	-8.27066	-51.5441	-8.36132	-50.9838	12090588	no	3	Group 1
Kerr et al. 2015	Goat Creek	171.562	-42.8386	River - river, perennial flow	-8.2	-51	-8.79648	-58.5611	-8.48919	-53.5608	-8.66321	-52.7041	12092271	no	2	Group 2
Kerr et al. 2015	Holts Creek	171.545	-42.8644	River - river, perennial flow	-8.3	-52	-9.06919	-61.8967	-8.77429	-57.1751	-9.09409	-56.9274	12093640	no	3	Group 1
Kerr et al. 2015	Wesley Creek	171.557	-42.867	River - river, perennial flow	-8.4	-55	-8.95875	-62.4844	-8.66818	-57.8104	-8.98409	-57.8433	12093733	no	3	Group 1
Kerr et al. 2015	Pegleg Creek	171.559	-42.8966	River - river, perennial flow	-8.7	-57	-8.97328	-63.0711	-8.70168	-58.7602	-8.92914	-59.231	12095188	no	3	Group 1
Kerr et al. 2015	Twin Creek	171.559	-42.9137	River - river, perennial flow	-8.3	-56	-8.90868	-63.6411	-8.65027	-59.5996	-9.16119	-62.7019	13095979	no	3	Group 1
Kerr et al. 2015	McGrath Creek	171.558	-42.9306	River - river, perennial flow	-8.8	-60	-8.91983	-63.9198	-8.67029	-60.0506	-8.74065	-59.1149	13096815	no	3	Group 1
Kerr et al. 2015	Rough Creek	171.567	-42.9493	River - river, perennial flow	-9.3	-63	-8.64175	-61.7809	-8.40573	-58.1647	-8.86017	-60.5519	13097845	no	3	Group 1
Kerr et al. 2015	Halpin Creek	171.58	-42.9749	River - river, perennial flow	-9.4	-64	-8.56021	-60.2739	-8.3441	-57.0119	-8.83203	-59.8399	13099056	no	2	Group 2
Kerr et al. 2015	Bruce Stream	171.633	-43.0317	River - river, perennial flow	-10	-69	-8.4694	-61.3154	-8.29999	-58.8194	-8.91597	-62.5575	13101765	no	3	Group 1
Kerr et al. 2015	Cass Stream	171.747	-43.0297	River - river, perennial flow	-10.4	-73	-9.06374	-63.504	-8.93112	-61.1823	-9.25317	-62.335	13101914	no	4	Group 1
Kerr et al. 2015	Broad Stream	171.654	-43.0332	River - river, perennial flow	-10.1	-70	-8.68216	-62.2596	-8.51785	-59.7251	-8.96785	-62.0736	13101495	no	3	Group 1
Kerr et al. 2015	Ribbonwood	171.773	-43.0835	River - river, perennial flow	-10.8	-76	-9.12196	-62.8398	-9.02491	-61.0745	-9.42743	-62.6487	13104558	no	3	Group 1
Kerr et al. 2015	Manson Creek	171.767	-43.133	River - river, perennial flow	-10.6	-75	-9.14973	-63.731	-9.09322	-62.8816	-9.35652	-62.8727	13107118	no	3	Group 1
Kerr et al. 2015	Broken River Camp	171.731	-43.1532	River - river, perennial flow	-10.4	-74	-9.11535	-63.9121	-9.06585	-63.3797	-9.14878	-63.143	13107862	no	2	Group 2
Kerr et al. 2015	Cheeseman Road Bend	171.727	-43.1942	River - river, perennial flow	-10.5	-79	-9.13473	-64.477	-9.11367	-64.5238	-9.69379	-66.906	13110220	no	3	Group 1
Kerr et al. 2015	Castle Hill Village	171.706	-43.2066	River - river, perennial flow	-11.2	-78	-9.16117	-64.1969	-9.14903	-64.4991	-9.36631	-64.5785	13110719	no	2	Group 2
Kerr et al. 2015	Whitewater Stream	171.724	-43.2463	River - river, perennial flow	-11.9	-82	-9.07138	-63.0677	-9.09001	-63.8907	-8.66113	-60.6121	13112749	no	1	Group 2
Kerr et al. 2015	Porter River	171.724	-43.2465	River - river, perennial flow	-11.3	-76	-9.07138	-63.0677	-9.09001	-63.8907	-8.66113	-60.6121	13112749	no	1	Group 2
Marttila et al. 2017	S7 - Waipara River North Branch	172.433	-42.9179	River - river, perennial flow	-8.76635	-59.0479	-8.2945	-55.3592	-8.3055	-53.3477	-8.23322	-56.5334	13095776	yes	3	Group 1
Marttila et al. 2017	S8 - Waipara River North Branch	172.498	-42.924	River - river, perennial flow	-7.95596	-54.541	-8.16532	-54.1072	-8.19281	-52.3172	-8.13095	-55.44	13096206	yes	3	Group 1
Marttila et al. 2017	S4 - Waipara River North Branch	172.428	-42.9246	River - river, perennial flow	-8.85125	-59.053	-8.2927	-55.3707	-8.30287	-53.3486	-8.23777	-56.757	13095939	yes	2	Group 2
Marttila et al. 2017	S6 - Waipara River North Branch	172.43	-42.9198	River - river, perennial flow	-8.79392	-58.9018	-8.2927	-55.3707	-8.30287	-53.3486	-8.23777	-56.757	13095939	yes	2	Group 2
Marttila et al. 2017	S3 - Waipara River North Branch	172.43	-42.937	River - river, perennial flow	-9.12875	-60.3001	-8.30921	-55.5631	-8.3241	-53.6038	-8.22157	-56.6245	13096483	yes	2	Group 2
Marttila et al. 2017	S1 - Lang's Gully Stream	172.42	-42.938	River - river, perennial flow	-9.29291	-61.1466	-8.28134	-55.2261	-8.30142	-53.3355	-8.11824	-55.6439	13096966	yes	1	Group 2
Marttila et al. 2017	S2 - Waipara River North Branch	172.427	-42.9419	River - river, perennial flow	-9.22086	-60.8431	-8.31769	-55.6621	-8.33776	-53.7716	-8.23641	-56.7757	13096967	yes	2	Group 2
Stewart et al. 1983	Pukepoto Stream	173.232	-35.154	River - river, perennial flow	NA	-20.5	-4.76852	-28.0242	-4.47114	-21.8303	-4.38241	-25.302	1005172	no	1	Group 2
Stewart et al. 1983	Kerikeri Domain	173.963	-35.2165	River - river, perennial flow	NA	-28.2	-5.17814	-30.3417	-4.71868	-23.9204	-4.88156	-27.609	1006886	no	5	Group 1
Stewart et al. 1983	Waima River	173.648	-35.4618	River - river, perennial flow	NA	-21.9	-5.39427	-31.0999	-4.95237	-24.571	-4.74965	-24.2614	1012880	no	6	Group 1
Stewart et al. 1983	Kauaerangi River	175.634	-37.1018	River - river, perennial flow	NA	-28.3	-6.2648	-38.6471	-5.95698	-32.3546	-5.71223	-33.5313	3043709	no	4	Group 1
Stewart et al. 1983	Waipa River	175.145	-37.6657	River - river, perennial flow	NA	-34.3	-6.12213	-36.433	-5.71613	-29.1615	-5.26347	-27.7045	3058087	no	7	Group 1
Stewart et al. 1983	Mangaohe Stream	175.139	-37.6772	River - river, perennial flow	NA	-30.9	-6.00828	-35.7785	-5.60112	-28.485	-4.87519	-24.7799	3058497	no	5	Group 1
Stewart et al. 1983	Te Puna	176.035	-37.6831	River - river, perennial flow	NA	-30.3	-5.84034	-34.3227	-5.05801	-24.9899	-4.95278	-29.2521	4059527	no	1	Group 2
Stewart et al. 1983	Wairoa River	176.094	-37.687	River - river, perennial flow	NA	-30.3	-5.77731	-34.0473	-4.97403	-24.7179	-4.08094	-25.3761	4059764	no	1	Group 2
Stewart et al. 1983	Karakatuwhero River	178.335	-37.6264	River - river, perennial flow	NA	-30.5	-4.91062	-25.9844	-4.82844	-26.2382	-5.00316	-26.3302	5060468	no	4	Group 1
Stewart et al. 1983	Awatere River	178.348	-37.6755	River - river, perennial flow	NA	-28.7	-5.41917	-30.3315	-5.33916	-30.6746	-5.61058	-32.0927	5063036	no	5	Group 1
Stewart et al. 1983	Kaukumautiti Stream	175.974	-37.8251	River - river, perennial flow	NA	-32.4	-6.33315	-39.1228	-5.43458	-29.2534	-5.93925	-36.0607	4066629	no	3	Group 1
Stewart et al. 1983	Waiapu River	178.294	-37.8926	River - river, perennial flow	NA	-35.8	-5.94549	-34.8398	-5.88455	-35.4841	-6.44523	-38.4025	5076269	no	6	Group 1
Stewart et al. 1983	Hamuranu Stream	176.258	-38.0345	River - river, perennial flow	NA	-34.8	-6.51293	-38.9865	-5.23372	-28.9992	-5.85697	-36.1826	4080426	no	2	Group 2
Stewart et al. 1983	Kapuaroa Stream	178.254	-37.9726	River - river, perennial flow	NA	-31.8	-5.49361	-31.4787	-5.44187	-32.1917	-5.74293	-35.7223	5081570	no	3	Group 1
Stewart et al. 1983	Awahou Stream	176.214	-38.0496	River - river, perennial flow	NA	-33.5	-6.58262	-39.1987	-5.31808	-29.0993	-6.17533	-37.8718	4081667	no	3	Group 1
Stewart et al. 1983	Waiteti Stream	176.208	-38.0719	River - river, perennial flow	NA	-34.2	-6.54655	-39.3072	-5.26238	-29.2131	-6.15357	-37.5576	4083363	no	4	Group 1
Stewart et al. 1983	Ngongotaha Stream	176.212	-38.0826	River - river, perennial flow	NA	-32.5	-6.52506	-39.7197	-5.23238	-29.6335	-5.93614	-35.5881	4084132	no	5	Group 1
Stewart et al. 1983	Waingaehu Stream	176.309	-38.1231	River - river, perennial flow	NA	-36.3	-6.47474	-40.2745	-5.09077	-30.4908	-5.88098	-37.8503	4087753	no	3	Group 1
Stewart et al. 1983	Utuhina Stream	176.241	-38.1293	River - river, perennial flow	NA	-33.4	-6.44154	-39.5277	-5.10276	-29.545	-5.89512	-36.5607	4088083	no	5	Group 1
Stewart et al. 1983	Makairika Stream	178.295	-38.0531	River - river, perennial flow	NA	-30.8	-5.57038	-31.9625	-5.51029	-32.8024	-5.84375	-36.9319	5088250	no	3	Group 1
Stewart et al. 1983	Waipa River	175.209	-38.1923	River - river, perennial flow	NA	-37.2	-6.45727	-39.2288	-5.94067	-30.2908	-5.6445	-30.5499	3091406	no	5	Group 1
Stewart et al. 1983	Waitomo River	175.104	-38.2603	River - river, perennial flow	NA	-31.7	-6.31929	-36.2989	-5.86322	-27.5461	-5.09893	-24.6236	3096929	no	4	Group 1
Stewart et al. 1983	Makokomuka Stream	178.262	-38.1668	River - river, perennial flow	NA	-30.7	-5.50965	-30.9646	-5.45331	-31.9267	-5.46748	-33.0763	5097728	no	2	Group 2
Stewart et al. 1983	Hakatere Stream	176.373	-38.322	River - river, perennial flow	NA	-40.1	-6.68995	-41.847	-5.36295	-33.0376	-5.85304	-37.9885	3104873	no	3	Group 1
Stewart et al. 1983	Waikekamuka Stream	176.391	-38.3375	River - river, perennial flow	NA	-42.7	-6.65038	-41.8238	-5.34379	-33.1594	-6.17178	-40.5488	3106400	no	4	Group 1
Stewart et al. 1983	Mangatuna River	178.276	-38.2941	River - river, perennial flow	NA	-31.1	-5.4815	-30.2459	-5.4175	-31.3678	-5.15875	-29.8588	5108992	no	3	Group 1
Stewart et al. 1983	Mokau River	175.11	-38.4152	River - river, perennial flow	NA	-36.3	-6.41801	-38.6629	-5.94314	-29.7874	-5.41867	-29.541	3110477	no	4	Group 1
Stewart et al. 1983	Waiotapu River	176.328	-38.4558	River - river, perennial flow	NA	-39.7	-6.42138	-39.4312	-5.24402	-31.2812	-5.93629	-38.4878	3116897	no	2	Group 2
Stewart et al. 1983	Waiotapu River	176.291	-38.4849	River - river, perennial flow	NA	-40.6	-6.70187	-41.674	-5.54463	-33.5862	-6.15145	-39.7101	3119079	no	5	Group 1
Stewart et al. 1983	Waipaoa River	177.861	-38.4679	River - river, perennial flow	NA	-37.6	-6.174	-36.6817	-6.18585	-37.5129	-6.29889	-39.118	5122353	no	7	Group 1
Stewart et al. 1983	Awakino River	174.842	-38.5779	River - river, perennial flow	NA	-31.1	-6.36774	-35.6205	-5.92935	-27.0384	-5.01934	-22.6088	3124540	no	5	Group 1
Stewart et al. 1983	Mangakari Stream	178.234	-38.5083	River - river, perennial flow	NA	-27	-5.74003	-31.7579	-5.66912	-33.1517	-5.74721	-35.1659	5127693	no	3	Group 1
Stewart et al. 1983	Maiapaoa River	177.913	-38.6002	River - river, perennial flow	NA	-37.7	-6.17417	-36.5256	-6.15916	-37.9049	-6.29084	-39.1678	5133934	no	7	Group 1
Stewart et al. 1983	Tawheru Stream	177.952	-38.5994	River - river, perennial flow	NA	-33.9	-6.01805	-34.5686	-5.9957	-35.9951	-6.22112	-41.0102	5133578	no	2	Group 2
Stewart et al. 1983	Whakatane River	176.924	-38.6453	River - river, perennial flow	NA	-38.4	-7.85621	-49.9752	-7.44384	-47.0988	-7.14497	-43.4212	4134432	no	5	Group 1
Stewart et al. 1983	Mokau River	174.651	-38.7044	River - river, perennial flow	NA	-35.8	-5.83984	-33.0276	-5.38255	-24.4493	-4.09933	-17.9293	3134863	no	2	Group 2
Stewart et al. 1983	Whakaohu Stream	177.891	-38.6188	River - river, perennial flow	NA	-36	-6.12556	-35.5923	-6.1109	-36.9838	-6.01632	-37.193	5135985	no	5	Group 1
Stewart et al. 1983	Waimata River	178.051	-38.655	River - river, perennial flow	NA	-30.4	-6.04233	-34.5272	-5.98399	-36.1782	-5.89452	-35.8725	5139218	no	5	Group 1
Stewart et al. 1983	Rahuiatemata Stream	177.062	-38.7094	River - river, perennial flow	NA	-47.2	-8.21827	-51.6977	-7.97641	-50.323	-8.06298	-50.3605	8140544	no	5	Group 1
Stewart et al. 1983	Hamanatu Stream	178.079	-38.67	River - river, perennial flow	NA	-31.7	-5.96743	-34.2606	-5.90158	-35.9451	-5.876	-37.0663	5140069	no	2	Group 2
Stewart et al. 1983	Inlet stream to Mokauawa Bay	177.093	-38.7287	River - river, perennial flow	NA	-48.2	-8.16148	-51.2667	-7.96554	-50.3406	-8.05662	-52.5132	8142241	no	4	Group 1
Stewart et al. 1983	Aniwaniwa Stream	177.162	-38.7451	River - river, perennial flow	NA	-45.9	-7.94282	-49.4173	-7.79051	-48.8944	-7.31746	-48.4086	8143275	no	4	Group 1
Stewart et al. 1983	Mangahutiwai Stream	174.621	-38.8104	River - river, perennial flow	NA	-32.6	-5.92458	-34.1613	-5.41956	-25.4668	-3.82532	-15.7787	6143321	no	1	Group 2
Stewart et al. 1983	Waapu Stream	177.041	-38.7418	River - river, perennial flow	NA	-48	-8.02109	-49.8427	-7.80293	-48.7341	-6.09494	-39.1717	8142865	no	1	Group 2
Stewart et al. 1983	Marauiti Stream	176.992	-38.7597	River - river, perennial flow	NA	-49	-8.04414	-50.1532	-7.80707	-48.894	-7.73435	-48.8073	8144051	no	3	Group 1
Stewart et al. 1983	Maraunui Stream	176.986	-38.7639	River - river, perennial flow	NA	-49.1	-8.00534	-49.7757	-7.77082	-48.5466	-7.58187	-47.5537	8144212	no	1	Group 2
Stewart et al. 1983	Waitewhenua Stream	174.982	-38.8398	River - river, perennial flow	NA	-32.9	-6.69809	-38.7951	-6.15223	-30.3595	-5.12554	-25.095	7146175	no	5	Group 1
Stewart et al. 1983	Te Arai River	177.818	-38.7594	River - river, perennial flow	NA	-33	-6.5892	-37.8013	-6.56228	-39.5779	-6.51412	-39.0117	5146495	no	4	Group 1
Stewart et al. 1983	Stream close to Te Umutiti	177.056	-38.7885	River - river, perennial flow	NA	-47.2	-7.84061	-47.9955	-7.66977	-47.357	-7.31443	-45.9681	8146399	no	1	Group 2
Stewart et al. 1983	Te Korokoroowhaitiri Tributary Stream	176.985	-38.7969	River - river, perennial flow	NA	-52.9	-7.92777	-49.1398	-7.73286	-48.2914	-7.50094	-48.5364	8146805	no	3	Group 1
Stewart et al. 1983	Te Korokoroowhaitiri Stream	176.984	-38.7961	River - river, perennial flow	NA	-50.3	-7.92777	-49.1398	-7.73286	-48.2914	-7.50094	-48.5364	8146805	no	3	Group 1
Stewart et al. 1983	Whakenepuru Stream	177.019	-38.7973	River - river, perennial flow	NA	-47.5	-7.87926	-48.9501	-7.68013	-48.0501	-7.0259	-46.0275	8145960	no	3	Group 1
Stewart et al. 1983	Paengarua Stream	177.05	-38.7969	River - river, perennial flow	NA	-49.2	-7.83031	-48.1846	-7.66058	-47.5616	-7.06626	-44.943	8146726	no	2	Group 2
Stewart et al. 1983	Taringamotu River	175.245	-38.8579	River - river, perennial flow	NA	-39.3	-6.77865	-41.5858	-6.21276	-33.6384	-5.81676	-33.0059	7147693	no	5	Group 1
Stewart et al. 1983	Tongaporutu River	174.635	-38.8665	River - river, perennial flow	NA	-27.4	-6.3357	-36.6389	-5.80486	-27.8998	-4.51302	-20.6314	6147642	no	5	Group 1
Stewart et al. 1983	Waitehetehe Stream	176.997	-38.8115	River - river, perennial flow	NA	-47.9	-7.89643	-49.1054	-7.71184	-48.3644	-7.71381	-50.1336	8147929	no	2	Group 2
Stewart et al. 1983	Ongarue River	175.257	-38.8835	River - river, perennial flow	NA	-40.1	-6.78467	-41.7252	-6.21933	-33.9304	-5.95107	-33.9718	7149586	no	6	Group 1
Stewart et al. 1983	Wanganui River	175.306	-38.8828	River - river, perennial flow	NA	-37.6	-7.24933	-44.4753	-6.68787	-36.7902	-6.80138	-39.4412	7149824	no	6	Group 1
Stewart et al. 1983	Rangitaiki River	176.372	-38.8788	River - river, perennial flow	NA	-43.7	-7.35912	-46.2431	-6.85543	-42.8452	-7.05654	-47.1838	4151458	no	5	Group 1
Stewart et al. 1983	Mimi River	174.484	-38.9576	River - river, perennial flow	NA	-29.4	-6.0832	-35.626	-5.49434	-26.7477	-4.18324	-19.6777	6154598	no	5	Group 1
Stewart et al. 1983	Uaiau River	177.25	-38.9209	River - river, perennial flow	NA	-38.3	-7.59353	-47.0956	-7.60719	-48.5593	-7.54069	-46.7143	8157577	no	6	Group 1
Stewart et al. 1983	Tongariro River	175.819	-38.9846	River - river, perennial flow	NA	-43.4	-6.93587	-41.7906	-6.45458	-36.8626	-6.06419	-35.8168	3159350	no	1	Group 2
Stewart et al. 1983	Tongariro River	175.819	-38.9871	River - river, perennial flow	NA	-47.7	-7.88872	-49.1784	-7.40818	-44.256	-7.74376	-46.8922	3159403	no	6	Group 1
Stewart et al. 1983	Wairoa River	177.427	-38.9411	River - river, perennial flow	NA	-37.6	-6.92273	-41.1069	-6.9606	-43.2225	-7.03905	-43.0816	8159412	no	7	Group 1
Stewart et al. 1983	Mangaoraka Stream	174.186	-39.0246	River - river, perennial flow	NA	-30.1	-6.00165	-35.4045	-5.39146	-26.4939	-4.81551	-26.5837	6160469	no	4	Group 1
Stewart et al. 1983	Stream, Tahora	174.803	-39.0291	River - river, perennial flow	NA	-32.5	-6.60055	-39.0745	-6.01918	-30.5657	-5.13754	-28.2628	7161414	no	3	Group 1
Stewart et al. 1983	Pihanga Reserve	175.775	-39.016	River - river, perennial flow	NA	-38.9	-7.36921	-45.5322	-6.91356	-40.6701	-6.80746	-42.0953	3161151	no	1	Group 2
Stewart et al. 1983	Waipunga River	176.556	-39.0083	River - river, perennial flow	NA	-43.1	-7.44531	-47.2191	-7.29834	-46.5894	-7.50246	-48.5022	8163433	no	5	Group 1
Stewart et al. 1983	Waiwhakaiho River	174.108	-39.0509	River - river, perennial flow	NA	-34.5	-6.70747	-39.8829	-6.11915	-30.992	-5.8454	-32.3712	6162449	no	4	Group 1
Stewart et al. 1983	Waitara River	174.266	-39.0568	River - river, perennial flow	NA	-35.3	-6.34409	-37.7272	-5.68926	-28.7226	-5.00356	-26.5655	6163900	no	6	Group 1
Stewart et al. 1983	Wanganui River	175.585	-39.0559	River - river, perennial flow	NA	-40.7	-8.1112	-50.5676	-7.67461	-45.1072	-8.26799	-50.7822	7165398	no	3	Group 1
Stewart et al. 1983	Oakura River	173.96	-39.1124	River - river, perennial flow	NA	-32.2	-5.80506	-34.3946	-5.28024	-25.5978	-4.61192	-25.5601	6168442	no	1	Group 2
Stewart et al. 1983	Mohaka River	177.131	-39.0758	River - river, perennial flow	NA	-43.1	-7.11767	-43.3552	-7.22399	-45.8306	-7.58449	-47.1182	8171608	no	7	Group 1
Stewart et al. 1983	Waiwhakaiho River	174.139	-39.1427	River - river, perennial flow	NA	-36	-7.06039	-42.0059	-6.43796	-32.9492	-6.15096	-34.5474	6171148	no	4	Group 1
Stewart et al. 1983	Waiongana Stream	174.192	-39.154	River - river, perennial flow	NA	-35.9	-6.3422	-37.455	-5.69296	-28.3435	-5.35179	-31.1189	6172417	no	1	Group 2
Stewart et al. 1983	Timaru Stream	173.922	-39.1556	River - river, perennial flow	NA	-29.8	-6.42496	-38.5655	-5.91497	-29.7617	-5.43795	-29.7815	6173349	no	3	Group 1
Stewart et al. 1983	Kaihihi Stream	173.873	-39.187	River - river, perennial flow	NA	-30.9	-6.32114	-37.6207	-5.84366	-28.9042	-5.43595	-30.4916	6174550	no	4	Group 1
Stewart et al. 1983	Waitepuku Stream	174.209	-39.2011	River - river, perennial flow	NA	-36.3	-6.60195	-38.9532	-5.93958	-29.7812	-5.65803	-33.3135	6176275	no	1	Group 2
Stewart et al. 1983	Mohaka River	176.397	-39.1644	River - river, perennial flow	NA	-47.4	-7.59719	-46.7772	-7.62696	-47.1796	-7.51857	-46.3293	8176760	no	6	Group 1
Stewart et al. 1983	Makino Stream	176.406	-39.1726	River - river, perennial flow	NA	-51.7	-7.55136	-46.5045	-7.59932	-47.0807	-7.53476	-46.5459	8177518	no	6	Group 1
Stewart et al. 1983	Waiweranui Stream	173.817	-39.2274	River - river, perennial flow	NA	-36.2	-6.44404	-38.5068	-6.00448	-29.8941	-5.81807	-33.4277	6177966	no	3	Group 1
Stewart et al. 1983	Whakapapanui River	175.539	-39.2	River - river, perennial flow	NA	-46.6	-8.67987	-56.6698	-8.3225	-52.0038	-8.95522	-56.3231	7177958	no	3	Group 1
Stewart et al. 1983	Tongariro River	175.778	-39.2096	River - river, perennial flow	NA	-47.7	-8.18007	-51.2202	-7.95174	-48.206	-8.31535	-51.1019	3178850	no	5	Group 1
Stewart et al. 1983	Uaihohonu Stream	175.735	-39.2171	River - river, perennial flow	NA	-50.6	-8.3412	-52.6391	-8.09895	-49.4084	-8.73242	-55.1352	3179516	no	5	Group 1
Stewart et al. 1983	Kapoaiata Stream	173.807	-39.2808	River - river, perennial flow	NA	-40.3	-6.50088	-38.9866	-6.07981	-30.389	-5.86086	-33.6968	6181613	no	3	Group 1
Stewart et al. 1983	Manganui River	174.263	-39.2808	River - river, perennial flow	NA	-38.7	-7.13737	-42.8845	-6.4464	-33.6441	-6.70647	-39.9684	6182318	no	4	Group 1
Stewart et al. 1983	Waikato Stream	175.743	-39.2805	River - river, perennial flow	NA	-47.3	-8.22537	-51.0031	-8.03657	-48.3213	-8.7254	-56.7787	3184322	no	2	Group 2
Stewart et al. 1983	Mangaturuturi River	175.391	-39.3046	River - river, perennial flow	NA	-55	-8.34847	-54.0466	-7.97938	-49.0315	-8.83778	-55.4037	7185470	no	3	Group 1
Stewart et al. 1983	Pungaerere Stream	173.805	-39.3351	River - river, perennial flow	NA	-32.3	-6.14608	-36.8295	-5.71553	-28.0793	-5.27812	-30.5316	6185762	no	3	Group 1
Stewart et al. 1983	Patea River	174.286	-39.3419	River - river, perennial flow	NA	-40.3	-6.99909	-42.0978	-6.33646	-32.8319	-6.43715	-39.7048	6186812	no	4	Group 1
Stewart et al. 1983	Stream, S Eltham	174.298	-39.4458	River - river, perennial flow	NA	-38.9	-6.47619	-40.3747	-5.86918	-31.0796	-5.48208	-35.1678	6193970	no	3	Group 1
Stewart et al. 1983	Makotuku River	175.283	-39.4222	River - river, perennial flow	NA	-48.8	-7.41926	-46.1723	-7.04569	-40.9334	-7.29912	-45.709	7193268	no	4	Group 1
Stewart et al. 1983	Esk River	176.877	-39.3937	River - river, perennial flow	NA	-41.7	-6.20713	-35.5104	-6.54355	-39.992	-7.03699	-47.794	8194321	no	5	Group 1
Stewart et al. 1983	Whangaehu River	175.578	-39.4635	River - river, perennial flow	NA	-54.9	-8.04286	-50.789	-7.87257	-47.918	-8.64591	-55.2363	7196647	no	4	Group 1
Stewart et al. 1983	Oea Stream	173.953	-39.5266	River - river, perennial flow	NA	-37.9	-6.25808	-38.032	-5.81626	-28.9251	-5.54229	-34.0537	6199104	no	4	Group 1
Stewart et al. 1983	Kapuni Stream	174.154	-39.5299	River - river, perennial flow	NA	-42.3	-6.83136	-41.7007	-6.31381	-32.3885	-6.27354	-37.9702	6199665	no	3	Group 1
Stewart et al. 1983	Kaupokonui Stream	174.072	-39.5446	River - river, perennial flow	NA	-43.8	-6.70262	-40.8783	-6.22408	-31.6238	-6.12531	-37.3286	6200550	no	6	Group 1
Stewart et al. 1983	Waingangaro River	174.21	-39.5775	River - river, perennial flow	NA	-36.2	-6.25479	-38.4553	-5.74182	-29.1294	-5.12769	-31.806	6202972	no	1	Group 2
Stewart et al. 1983	Waihi Stream	174.252	-39.587	River - river, perennial flow	NA	-37	-6.2875	-38.7467	-5.76952	-29.426	-5.27633	-33.3438	6203621	no	3	Group 1
Stewart et al. 1983	Hautapu Stream	175.708	-39.5696	River - river, perennial flow	NA	-48.4	-7.2525	-46.2156	-7.22667	-44.7644	-6.50913	-41.7934	7204043	no	5	Group 1
Stewart et al. 1983	Tangahoe River	174.345	-39.6094	River - river, perennial flow	NA	-37.2	-6.43251	-39.9371	-5.90175	-30.6753	-4.76039	-27.6197	6204134	no	6	Group 1
Stewart et al. 1983	Tutuakuri River	176.835	-39.549	River - river, perennial flow	NA	-43.1	-6.4596	-37.9748	-6.86692	-43.1082	-7.48556	-51.3445	8204885	no	6	Group 1
Stewart et al. 1983	Manawapau River	174.375	-39.6393	River - river, perennial flow	NA	-37.8	-6.30156	-38.5939	-5.7847	-29.3602	-5.17958	-32.0208	6206824	no	1	Group 2
Stewart et al. 1983	Ngaruroro River	176.762	-39.5885	River - river, perennial flow	NA	-47.3	-7.06711	-43.3505	-7.46413	-48.4279	-7.95552	-51.4645	8207058	no	6	Group 1
Stewart et al. 1983	Ngaruroro River	176.712	-39.5973	River - river, perennial flow	NA	-45.2	-5.65643	-32.2466	-6.04698	-37.2012	-5.69071	-38.1256	8207465	no	1	Group 2
Stewart et al. 1983	Hapokopoku Stream	175.326	-39.643	River - river, perennial flow	NA	-49.3	-7.25901	-44.956	-6.94891	-40.3763	-6.85936	-40.5548	7208103	no	5	Group 1
Stewart et al. 1983	Whenurakura River	174.545	-39.7627	River - river, perennial flow	NA	-40.2	-6.62076	-41.0727	-6.14653	-32.1126	-4.96554	-27.7933	6214444	no	5	Group 1
Stewart et al. 1983	Patea River	174.558	-39.7908	River - river, perennial flow	NA	-35.5	-6.34053	-38.2967	-5.883	-29.3589	-5.33051	-33.3977	6216046	no	1	Group 2
Stewart et al. 1983	Mangawhero River	175.27	-39.7895	River - river, perennial flow	NA	-48.5	-7.21755	-44.5729	-6.86058	-39.4423	-6.60937	-38.0883	7216814	no	5	Group 1
Stewart et al. 1983	Waitotora River	174.737	-39.8061	River - river, perennial flow	NA	-37.6	-6.68394	-41.1411	-6.22219	-32.7588	-4.95282	-26.5195	6217116	no	7	Group 1
Stewart et al. 1983	Mangamauku Stream	176.489	-39.8028	River - river, perennial flow	NA	-41	-6.62646	-39.4172	-6.92589	-43.6327	-7.10803	-45.9295	8218814	no	4	Group 1
Stewart et al. 1983	Kai Iwi Stream	174.932	-39.8468	River - river, perennial flow	NA	-42.9	-6.67047	-40.6945	-6.22133	-33.166	-5.30409	-31.3219	7219474	no	1	Group 2
Stewart et al. 1983	Uaipawa River	176.445	-39.8641	River - river, perennial flow	NA	-44.2	-7.01271	-42.6594	-7.26911	-46.4896	-7.41515	-45.6262	8221764	no	5	Group 1
Stewart et al. 1983	Tukituki River	176.73	-39.9182	River - river, perennial flow	NA	-41.8	-6.30376	-36.1037	-6.52415	-40.775	-6.27873	-39.125	8224727	no	1	Group 2
Stewart et al. 1983	Tukituki River	176.353	-39.9356	River - river, perennial flow	NA	-44	-7.35388	-45.4151	-7.55162	-48.6273	-7.45117	-44.8453	8225022	no	4	Group 1
Stewart et al. 1983	Whangaehu River	175.167	-40.005	River - river, perennial flow	NA	-54.2	-6.49949	-39.1545	-6.12034	-32.6611	-5.38781	-31.7744	7226338	no	2	Group 2
Stewart et al. 1983	Tukipo River	176.382	-39.9815	River - river, perennial flow	NA	-39.8	-6.97644	-41.968	-7.13934	-44.9445	-7.18527	-45.1129	8226848	no	5	Group 1
Stewart et al. 1983	Stream, Rangitikei River	175.389	-40.1891	River - river, perennial flow	NA	-32.7	-7.22079	-44.9266	-6.83675	-39.0057	-7.03776	-41.9329	7233086	no	7	Group 1
Stewart et al. 1983	Rangitikei River	175.389	-40.1891	River - river, perennial flow	NA	-47.8	-7.22079	-44.9266	-6.83675	-39.0057	-7.03776	-41.9329	7233086	no	7	Group 1
Stewart et al. 1983	Manawatu River	175.278	-40.5026	River - river, perennial flow	NA	-40	-6.36205	-39.3339	-5.73922	-30.7182	-5.13795	-32.9117	7242562	no	2	Group 2
Stewart et al. 1983	Ohau River	175.241	-40.6714	River - river, perennial flow	NA	-33.7	-7.28501	-45.5331	-6.54682	-35.8096	-5.79837	-33.6117	7247769	no	5	Group 1
Stewart et al. 1983	Otaki River	175.145	-40.7707	River - river, perennial flow	NA	-36	-7.26674	-45.1632	-6.48409	-34.8033	-5.8448	-32.7438	9250541	no	6	Group 1
Stewart et al. 1983	Waingawa River	175.609	-40.9647	River - river, perennial flow	NA	-40.5	-7.8045	-48.9795	-6.98411	-39.3096	-6.74162	-40.1972	9256482	no	5	Group 1
Stewart et al. 1983	Waihune River	175.495	-41.0587	River - river, perennial flow	NA	-36.9	-7.88604	-48.5987	-7.05433	-38.2942	-6.71461	-38.2986	9258949	no	5	Group 1
Stewart et al. 1983	Tauherenikau R, Featherston	175.361	-41.1442	River - river, perennial flow	NA	-37.5	-7.62441	-47.1789	-6.79376	-36.5233	-6.46433	-38.9203	9260654	no	4	Group 1
Stewart et al. 1983	Hutt River	174.906	-41.2045	River - river, perennial flow	NA	-36.8	-7.08057	-44.9556	-6.43508	-34.608	-5.83174	-36.2172	9262516	yes	6	Group 1
Stewart et al. 1983	Ruamahanga R, Martinborough	175.435	-41.2027	River - river, perennial flow	NA	-37.3	-7.4255	-46.518	-6.66607	-36.0076	-6.37319	-40.6857	9262654	no	7	Group 1
Stewart et al. 1983	Takaka River	172.792	-40.83	River - river, perennial flow	NA	-57	-7.24635	-47.2966	-7.14427	-44.1751	-7.27973	-43.0515	10002117	yes	5	Group 1
Stewart et al. 1983	Anatoki River	172.799	-40.8645	River - river, perennial flow	NA	-41	-7.5064	-50.351	-7.41311	-47.3101	-7.30211	-42.9031	10002736	no	4	Group 1
Stewart et al. 1983	Waingaro River	172.808	-40.8826	River - river, perennial flow	NA	-45	-7.40959	-48.6699	-7.32341	-45.6803	-7.49417	-43.3891	10003267	no	4	Group 1
Stewart et al. 1983	Whangamoa River	173.51	-41.172	River - river, perennial flow	NA	-32	-6.65322	-43.0191	-6.60609	-39.2159	-6.33223	-39.4792	10010788	no	4	Group 1
Stewart et al. 1983	Graham River	172.813	-41.1993	River - river, perennial flow	NA	-46	-7.18523	-48.6558	-7.24091	-46.4493	-6.86166	-41.3998	10011841	no	4	Group 1
Stewart et al. 1983	Pelorus River	173.727	-41.2675	River - river, perennial flow	NA	-37	-6.43659	-40.6434	-6.36804	-36.2929	-5.08888	-28.3605	11014434	no	1	Group 2
Stewart et al. 1983	Karamea River	172.131	-41.2611	River - river, perennial flow	NA	-39	-7.38414	-47.1828	-7.32228	-43.7593	-7.24798	-39.2828	12014056	no	6	Group 1
Stewart et al. 1983	Maitai River	173.3	-41.2767	River - river, perennial flow	NA	-37	-6.68292	-43.2266	-6.72559	-40.6021	-6.41166	-39.3178	10014655	no	5	Group 1
Stewart et al. 1983	Little Wanganui	172.092	-41.3755	River - river, perennial flow	NA	-32	-7.28106	-47.2732	-7.23244	-43.518	-6.43774	-37.1519	12019056	no	4	Group 1
Stewart et al. 1983	Wai-iti River	173.041	-41.4044	River - river, perennial flow	NA	-42	-6.73737	-43.6762	-6.89457	-41.8403	-6.64596	-40.7321	10019860	no	5	Group 1
Stewart et al. 1983	Wairoa River	173.13	-41.4056	River - river, perennial flow	NA	-40	-7.05298	-47.2285	-7.19805	-45.3291	-7.05652	-42.8786	10020165	no	5	Group 1
Stewart et al. 1983	Wairau River	173.81	-41.4754	River - river, perennial flow	NA	-54	-6.8109	-44.793	-6.75864	-40.8352	-6.19222	-38.4619	11023283	no	4	Group 1
Stewart et al. 1983	Wairau River	173.811	-41.4755	River - river, perennial flow	NA	-60	-6.8109	-44.793	-6.75864	-40.8352	-6.19222	-38.4619	11023283	no	4	Group 1
Stewart et al. 1983	Taylor River	173.956	-41.5095	River - river, perennial flow	NA	-51	-6.74553	-44.0179	-6.64912	-39.5202	-6.41776	-42.3402	11024863	no	5	Group 1
Stewart et al. 1983	Mokohinui River	171.968	-41.5292	River - river, perennial flow	NA	-36	-7.44396	-48.3449	-7.35659	-43.6662	-6.89483	-38.0348	12025798	no	6	Group 1
Stewart et al. 1983	Awatere River	174.077	-41.6587	River - river, perennial flow	NA	-61	-7.88974	-55.3516	-7.77481	-50.8845	-8.35232	-56.2225	11031665	no	6	Group 1
Stewart et al. 1983	Buller River	172.657	-41.7026	River - river, perennial flow	NA	-49	-7.72213	-53.3398	-7.98652	-51.1381	-7.94346	-51.0757	12033581	no	6	Group 1
Stewart et al. 1983	Waihopa River	173.423	-41.735	River - river, perennial flow	NA	-64	-7.94964	-56.61	-8.10236	-55.0222	-8.26892	-54.1752	11035253	no	5	Group 1
Stewart et al. 1983	Buller River	171.595	-41.7665	River - river, perennial flow	NA	-46	-7.42915	-50.1085	-7.14211	-42.9944	-7.08849	-42.0787	12037247	no	7	Group 1
Stewart et al. 1983	Buller River	172.218	-41.7777	River - river, perennial flow	NA	-51	-7.41182	-50.986	-7.44296	-46.6959	-7.44258	-45.5522	12037354	no	7	Group 1
Stewart et al. 1983	Buller River	172.033	-41.7866	River - river, perennial flow	NA	-46	-7.58831	-51.8183	-7.49958	-46.5638	-7.52645	-45.6696	12039115	no	7	Group 1
Stewart et al. 1983	Hopeless Creek	172.757	-41.9304	River - river, perennial flow	NA	-58	-8.11142	-60.8139	-8.41526	-58.7652	-8.61038	-58.2229	12046483	no	3	Group 1
Stewart et al. 1983	Kekerengu River	173.999	-42.0016	River - river, perennial flow	NA	-39	-7.00956	-45.4068	-6.93252	-42.7011	-6.85007	-44.5935	13050753	no	4	Group 1
Stewart et al. 1983	Clarence River	173.841	-42.1107	River - river, perennial flow	NA	-69	-7.24065	-46.5013	-7.2053	-44.7115	-7.2292	-48.1838	13056527	no	1	Group 2
Stewart et al. 1983	Hapuku River	173.691	-42.3022	River - river, perennial flow	NA	-52	-8.03555	-56.9486	-8.0123	-55.8527	-9.05707	-61.0295	13066195	no	4	Group 1
Stewart et al. 1983	Upper Grey River	172.13	-42.3959	River - river, perennial flow	NA	-49	-7.80031	-55.633	-7.57194	-49.8916	-7.37421	-48.1534	12071169	no	4	Group 1
Stewart et al. 1983	Kowhai River	173.63	-42.407	River - river, perennial flow	NA	-56	-7.80165	-53.6047	-7.77263	-52.7123	-8.55896	-57.2113	13071313	no	4	Group 1
Stewart et al. 1983	Grey River	171.324	-42.4332	River - river, perennial flow	NA	-41	-7.40833	-49.5729	-6.8464	-40.9888	-6.34584	-38.7322	12073389	no	7	Group 1
Stewart et al. 1983	Chatterton River	172.813	-42.5329	River - river, perennial flow	NA	-58	-8.43183	-58.001	-8.45618	-55.9211	-8.59911	-56.4524	13076937	no	4	Group 1
Stewart et al. 1983	Taramakau River	171.145	-42.5606	River - river, perennial flow	NA	-39	-7.95923	-52.8544	-7.48467	-44.8496	-7.68104	-46.6083	12079639	no	6	Group 1
Stewart et al. 1983	Hokitika River	170.999	-42.7459	River - river, perennial flow	NA	-46	-7.70961	-50.1445	-7.34543	-43.7166	-7.32894	-45.0241	12088285	no	6	Group 1
Stewart et al. 1983	Big Waitaha	170.685	-42.9805	River - river, perennial flow	NA	-49	-7.964	-53.4774	-7.73438	-49.822	-8.17759	-51.2808	12100095	no	5	Group 1
Stewart et al. 1983	Kowai River	172.747	-43.1911	River - river, perennial flow	NA	-57	-7.24459	-45.2352	-7.42413	-45.6538	-7.79609	-54.6395	13109958	no	5	Group 1
Stewart et al. 1983	Whataroa River	170.403	-43.2858	River - river, perennial flow	NA	-57	-8.66072	-59.3557	-8.57099	-59.1834	-9.36937	-60.2277	12115419	no	6	Group 1
Stewart et al. 1983	Waiho River	170.056	-43.2849	River - river, perennial flow	NA	-63	-8.63332	-60.5906	-8.50654	-59.0461	-9.11055	-59.5809	12116161	no	5	Group 1
Stewart et al. 1983	Hawkins River	171.907	-43.3732	River - river, perennial flow	NA	-59	-8.3139	-54.8612	-8.46569	-57.3654	-8.53734	-57.8068	13118452	no	4	Group 1
Stewart et al. 1983	Waimakariri River	172.652	-43.4124	River - river, perennial flow	NA	-57	-7.85233	-52.9004	-8.11573	-54.6502	-8.54479	-56.5954	13119371	yes	7	Group 1
Stewart et al. 1983	Waimakariri River	172.646	-43.415	River - river, perennial flow	NA	-57	-7.85233	-52.9004	-8.11573	-54.6502	-8.54479	-56.5954	13119371	no	7	Group 1
Stewart et al. 1983	Selwyn River	171.893	-43.4613	River - river, perennial flow	NA	-59	-8.42537	-55.5044	-8.62942	-59.503	-8.78365	-59.09	13122878	no	5	Group 1
Stewart et al. 1983	Cook River	169.966	-43.4991	River - river, perennial flow	NA	-60	-8.89949	-63.1473	-8.80248	-63.0401	-9.42937	-61.5837	12126601	no	5	Group 1
Stewart et al. 1983	Horata River	171.816	-43.526	River - river, perennial flow	NA	-53	-8.16807	-52.6652	-8.40431	-57.6678	-8.78222	-59.4839	13126484	no	4	Group 1
Stewart et al. 1983	Heathcote River	172.565	-43.5644	River - river, perennial flow	NA	-48	-7.0804	-44.3204	-7.29374	-47.5046	-7.94264	-58.7679	13127993	no	1	Group 2
Stewart et al. 1983	Waireka River	172.065	-43.548	River - river, perennial flow	NA	-55	-7.80337	-50.1062	-8.03095	-54.7985	-8.36983	-57.8991	13127223	no	4	Group 1
Stewart et al. 1983	Rhodes Spring	172.621	-43.6579	River - river, perennial flow	NA	-48	-7.37148	-46.4653	-7.54216	-50.2397	-7.73444	-53.8786	13132838	no	1	Group 2
Stewart et al. 1983	Rakaia River	172.034	-43.7479	River - river, perennial flow	NA	-59	-7.57153	-47.9548	-7.83331	-54.7573	-8.48381	-61.1295	13138803	no	2	Group 2
Stewart et al. 1983	Paringa River	169.492	-43.7117	River - river, perennial flow	NA	-49	-8.29127	-57.2184	-8.13872	-55.2074	-7.99113	-51.0149	12139745	no	5	Group 1
Stewart et al. 1983	Moeraki River	169.267	-43.7172	River - river, perennial flow	NA	-40	-7.74832	-52.5494	-7.58943	-49.0589	-5.94462	-36.2033	12140516	no	4	Group 1
Stewart et al. 1983	Ashburton River	171.738	-43.9106	River - river, perennial flow	NA	-76	-8.03055	-53.2138	-8.47034	-62.8577	-9.41989	-64.4524	13148714	no	6	Group 1
Stewart et al. 1983	Haast River	169.054	-43.8543	River - river, perennial flow	NA	-52	-7.95613	-54.9223	-7.79412	-50.6684	-7.98879	-51.3565	12148590	no	6	Group 1
Stewart et al. 1983	Rangitata River	171.404	-44.0525	River - river, perennial flow	NA	-70	-8.38779	-57.6912	-9.14658	-69.5162	-10.1673	-69.9426	13156208	no	6	Group 1
Stewart et al. 1983	Waitoto River	168.797	-43.9895	River - river, perennial flow	NA	-42	-8.19515	-58.5421	-8.04918	-53.7024	-7.7173	-48.8597	12155593	no	5	Group 1
Stewart et al. 1983	Arawata River	168.726	-44.0457	River - river, perennial flow	NA	-53	-8.12421	-58.3223	-7.99041	-53.4815	-7.73508	-49.6866	12159388	no	6	Group 1
Stewart et al. 1983	Orari River	171.346	-44.1846	River - river, perennial flow	NA	-74	-8.22657	-53.9137	-9.14352	-66.4851	-9.61022	-63.7456	13163630	no	6	Group 1
Stewart et al. 1983	Waitaki River	171.1	-44.9266	River - river, perennial flow	NA	-67	-7.64908	-49.0692	-8.15618	-51.863	-7.85685	-53.6394	13210926	no	5	Group 1
Stewart et al. 1983	Manuherikia River	169.761	-44.9914	River - river, perennial flow	NA	-81	-8.96796	-62.0412	-9.21373	-66.2188	-10.1684	-70.5632	14218459	yes	6	Group 1
Stewart et al. 1983	Shotover River	168.672	-44.9883	River - river, perennial flow	NA	-75	-9.12171	-67.9163	-9.39906	-65.9151	-9.95638	-68.5622	14220545	yes	6	Group 1
Stewart et al. 1983	Eglington River	167.978	-45.0876	River - river, perennial flow	NA	-59	-8.5662	-64.724	-8.59463	-61.067	-8.827	-59.788	15229031	no	5	Group 1
Stewart et al. 1983	Clutha River	169.39	-45.2585	River - river, perennial flow	NA	-65	-8.62512	-62.7395	-8.80323	-64.5625	-9.0137	-62.9679	14237668	yes	8	Group 1
Stewart et al. 1983	Taieri River	170.164	-45.9801	River - river, perennial flow	NA	-56	-8.12085	-55.0795	-8.26873	-57.4346	-8.83466	-60.7713	14289823	no	6	Group 1
Stewart et al. 1983	Mataura River	168.95	-46.0988	River - river, perennial flow	NA	-65	-8.24226	-57.6765	-8.29782	-57.0754	-8.56393	-56.8161	15299973	no	7	Group 1
Stewart et al. 1983	Tokomariro River	169.977	-46.1548	River - river, perennial flow	NA	-46	-7.90802	-53.3716	-8.05611	-55.0735	-7.63121	-49.9577	14301732	no	6	Group 1

## Sheet: References
ref	DOI
Lachniet et al. 2021	https://doi.org/10.1029/2021PA004220
Kerr et al. 2015	https://doi.org/10.1175/JHM-D-13-0141.1
Marttila et al. 2017	https://doi.org/10.1002/eco.1930
Stewart et al. 1983
